# Supplementary material for: Design and construction of a microfluidics workstation for high-throughput multi-wavelength fluorescence and transmittance activated droplet analysis and sorting
Source: Springer Nature journal article supplement (doi:10.1038/s41596-022-00796-2), 2023-01-27
Supplement: MOESM16 [file 41596_2022_796_MOESM16_ESM55.zip]

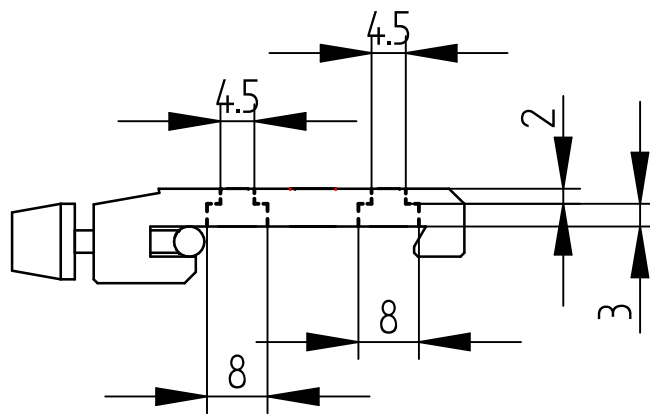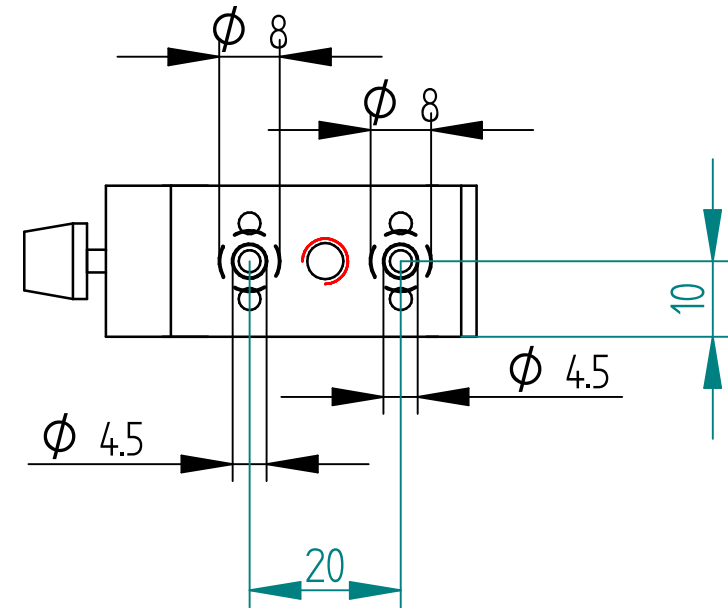

| 1                                                                                     |                        |                                         |                   |                    |
|---------------------------------------------------------------------------------------|------------------------|-----------------------------------------|-------------------|--------------------|
| 1                                                                                     | 10                     | Rail clamp                              | material provided | component provided |
| Rep                                                                                   | Quantité               | Denomination                            | Matiere           | Dimension          |
| Nom Resp.                                                                             | Jatin Panwar           |                                         | Nom               | Date               |
| Téléphone                                                                             | +41789264420           | Projet                                  | Workstation       |                    |
| Laboratoire                                                                           | LBMM                   | Dessiné                                 |                   |                    |
| Prof. resp.                                                                           | Prof. Christoph Merten | Modifié                                 |                   |                    |
|  |                        | Denomination<br>Rail clamp Modification |                   | Numero dessin<br>1 |
