# Supplementary material for: Design and construction of a microfluidics workstation for high-throughput multi-wavelength fluorescence and transmittance activated droplet analysis and sorting
Source: Springer Nature journal article supplement (doi:10.1038/s41596-022-00796-2), 2023-01-27
Supplement: MOESM17 [file 41596_2022_796_MOESM17_ESM56.zip]

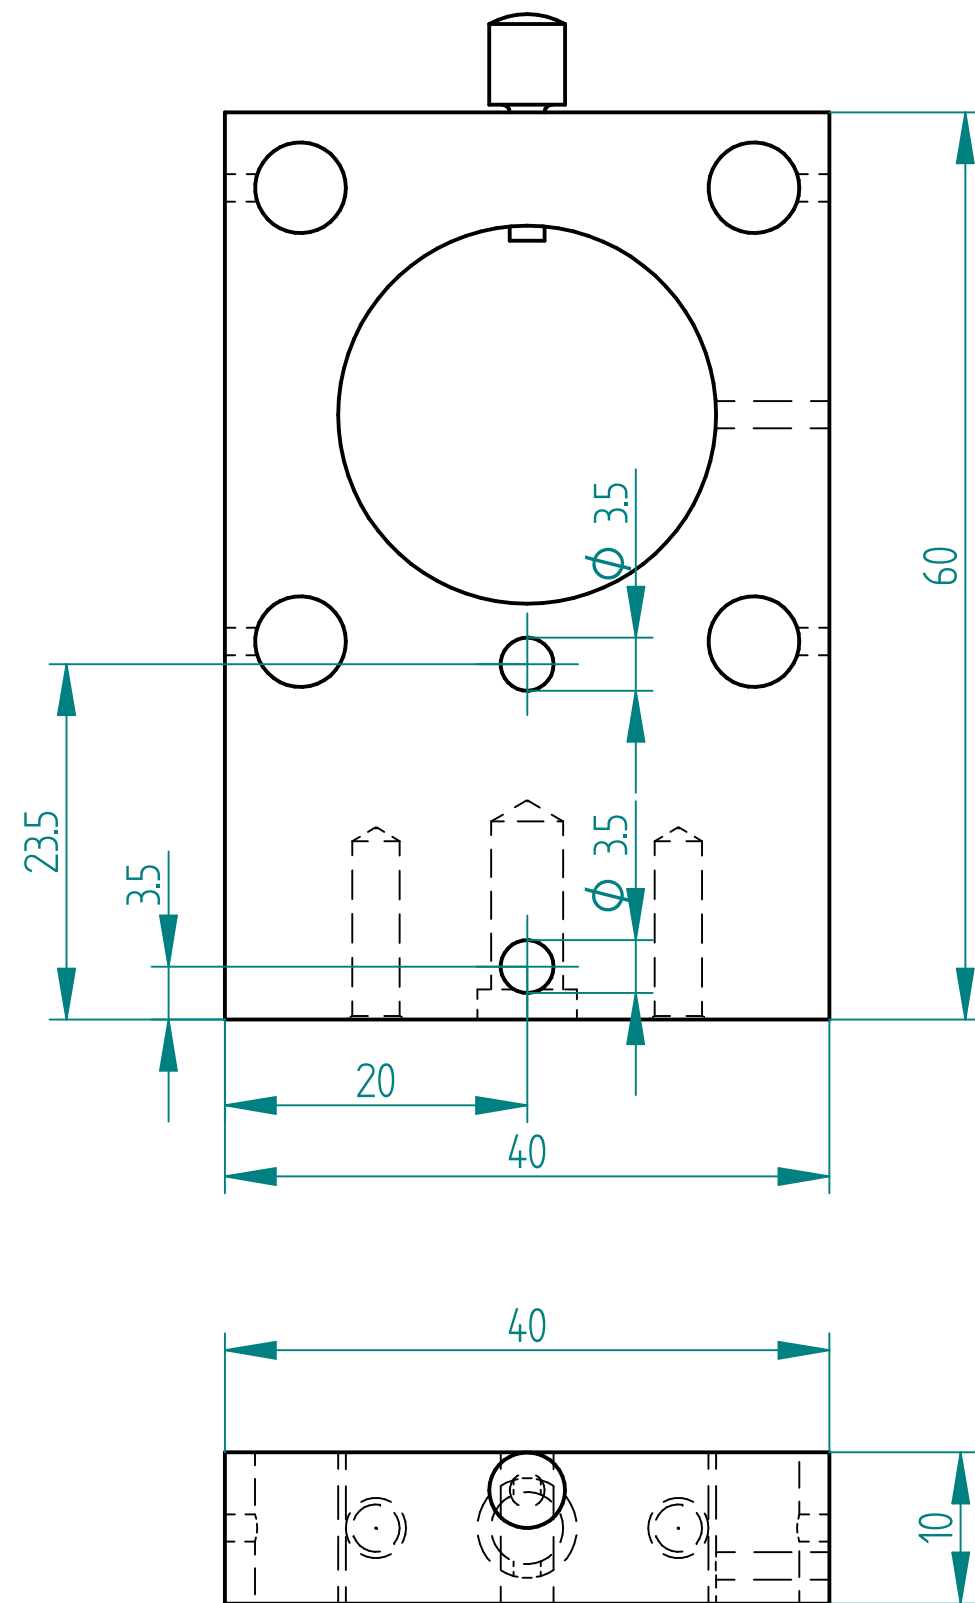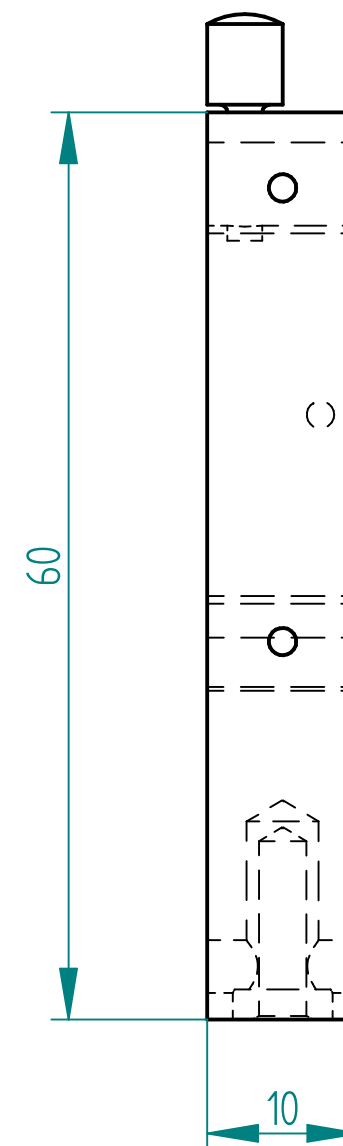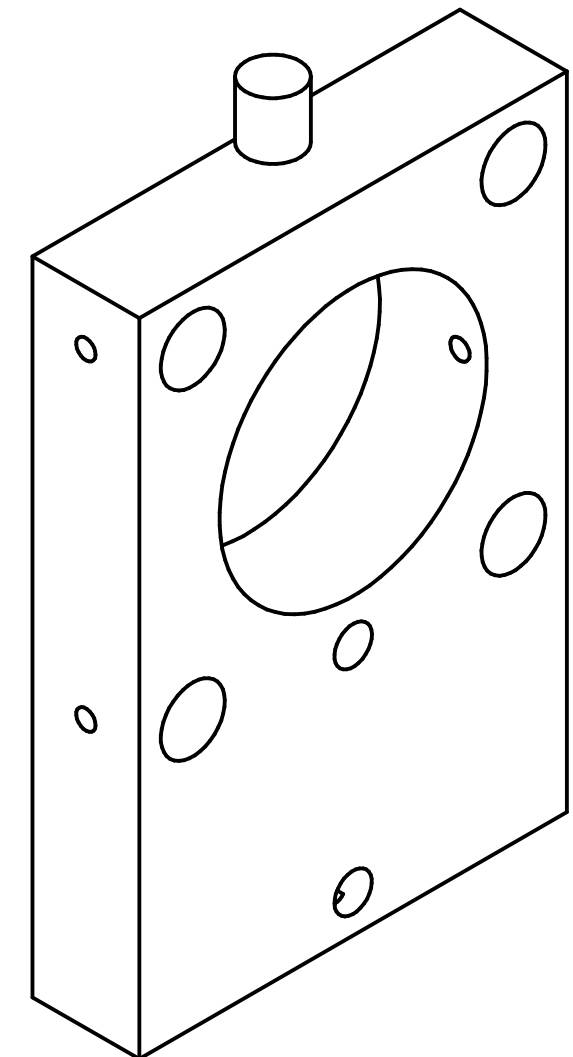

20-LBMM-JP-010

| 1                                                                                     |                        |                               |             |                       |
|---------------------------------------------------------------------------------------|------------------------|-------------------------------|-------------|-----------------------|
| 1                                                                                     | 12                     | Filter holder                 | Aluminium   | 60 mm x 40 mm x 10 mm |
| Rep                                                                                   | Quantité               | Denomination                  | Matiere     | Dimension             |
| Nom Resp.                                                                             | Jatin Panwar           |                               | Nom         | Date                  |
| Téléphone                                                                             | +41789264420           | Projet                        | Workstation |                       |
| Laboratoire                                                                           | LBMM                   | Dessiné                       |             | 05.08.2020            |
| Prof. resp.                                                                           | Prof. Christoph Merten | Modifié                       |             |                       |
|  |                        | Denomination<br>Filter holder |             | Numero dessin<br>1    |
