# Supplementary material for: Design and construction of a microfluidics workstation for high-throughput multi-wavelength fluorescence and transmittance activated droplet analysis and sorting
Source: Springer Nature journal article supplement (doi:10.1038/s41596-022-00796-2), 2023-01-27
Supplement: MOESM18 [file 41596_2022_796_MOESM18_ESM57.zip]

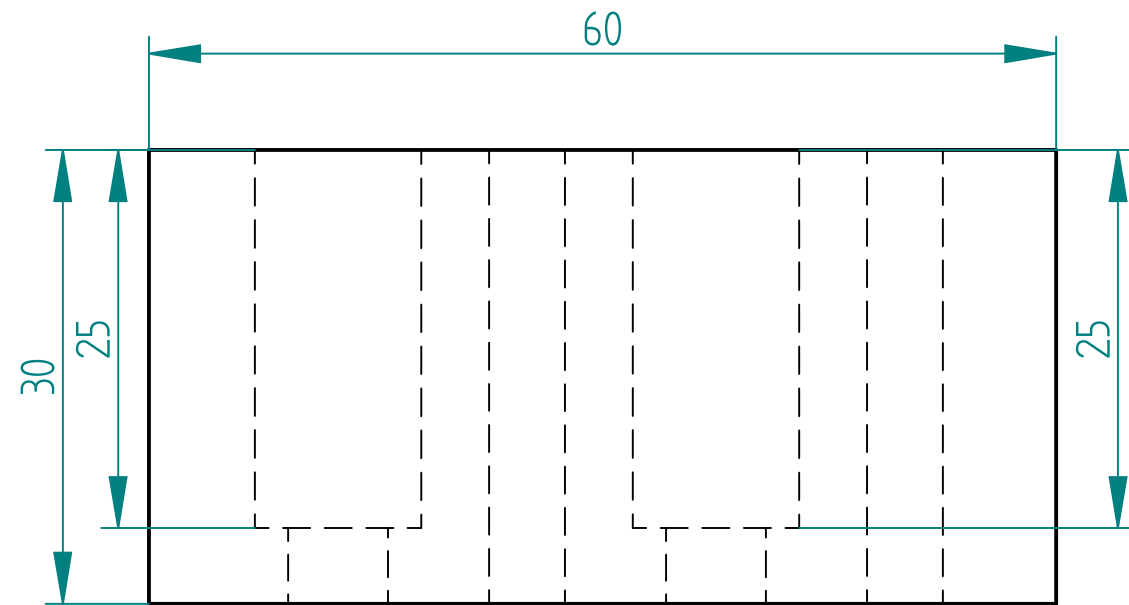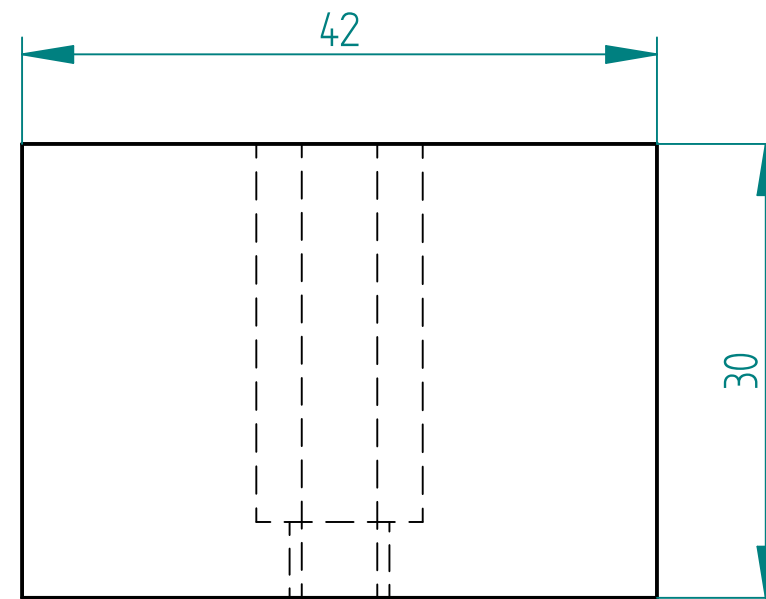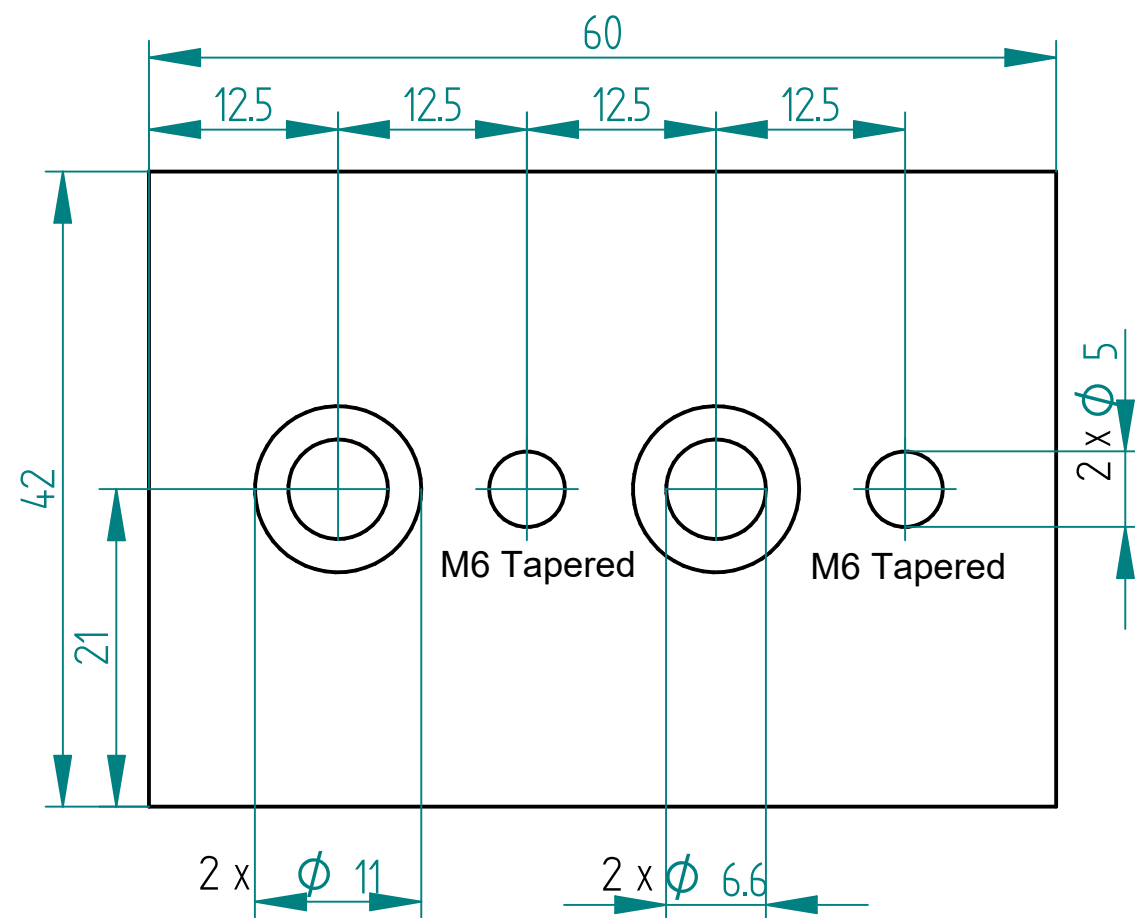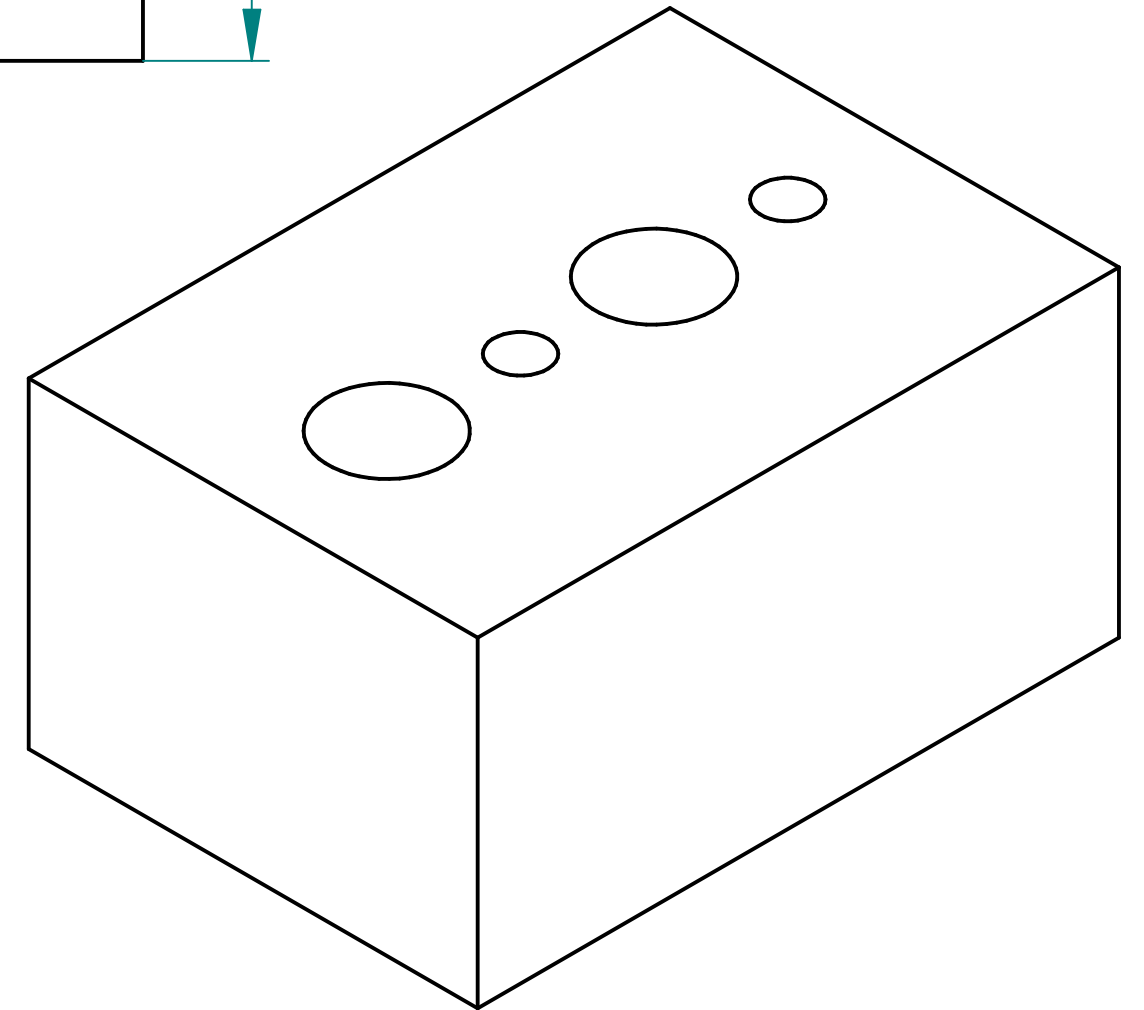

|                                                                                       |                        |                 |             |                       |
|---------------------------------------------------------------------------------------|------------------------|-----------------|-------------|-----------------------|
| 1                                                                                     |                        |                 |             |                       |
| 1                                                                                     | 22                     | Block for rails | Aluminium   | 30 mm x 60 mm x 42 mm |
| Rep                                                                                   | Quantité               | Denomination    | Matiere     | Dimension             |
| Nom Resp.                                                                             | Jatin Panwar           |                 | Nom         | Date                  |
| Téléphone                                                                             | +41789264420           | Projet          | Workstation |                       |
| Laboratoire                                                                           | LBMM                   | Dessiné         |             | 03.07.2020            |
| Prof. resp.                                                                           | Prof. Christoph Merten | Modifié         |             |                       |
|  |                        | Denomination    |             | Numero dessin         |
|                                                                                       |                        | Block for rails |             | 5                     |

20-LBMM-JP-010
