# Supplementary material for: Design and construction of a microfluidics workstation for high-throughput multi-wavelength fluorescence and transmittance activated droplet analysis and sorting
Source: Springer Nature journal article supplement (doi:10.1038/s41596-022-00796-2), 2023-01-27
Supplement: MOESM19 [file 41596_2022_796_MOESM19_ESM58.zip]

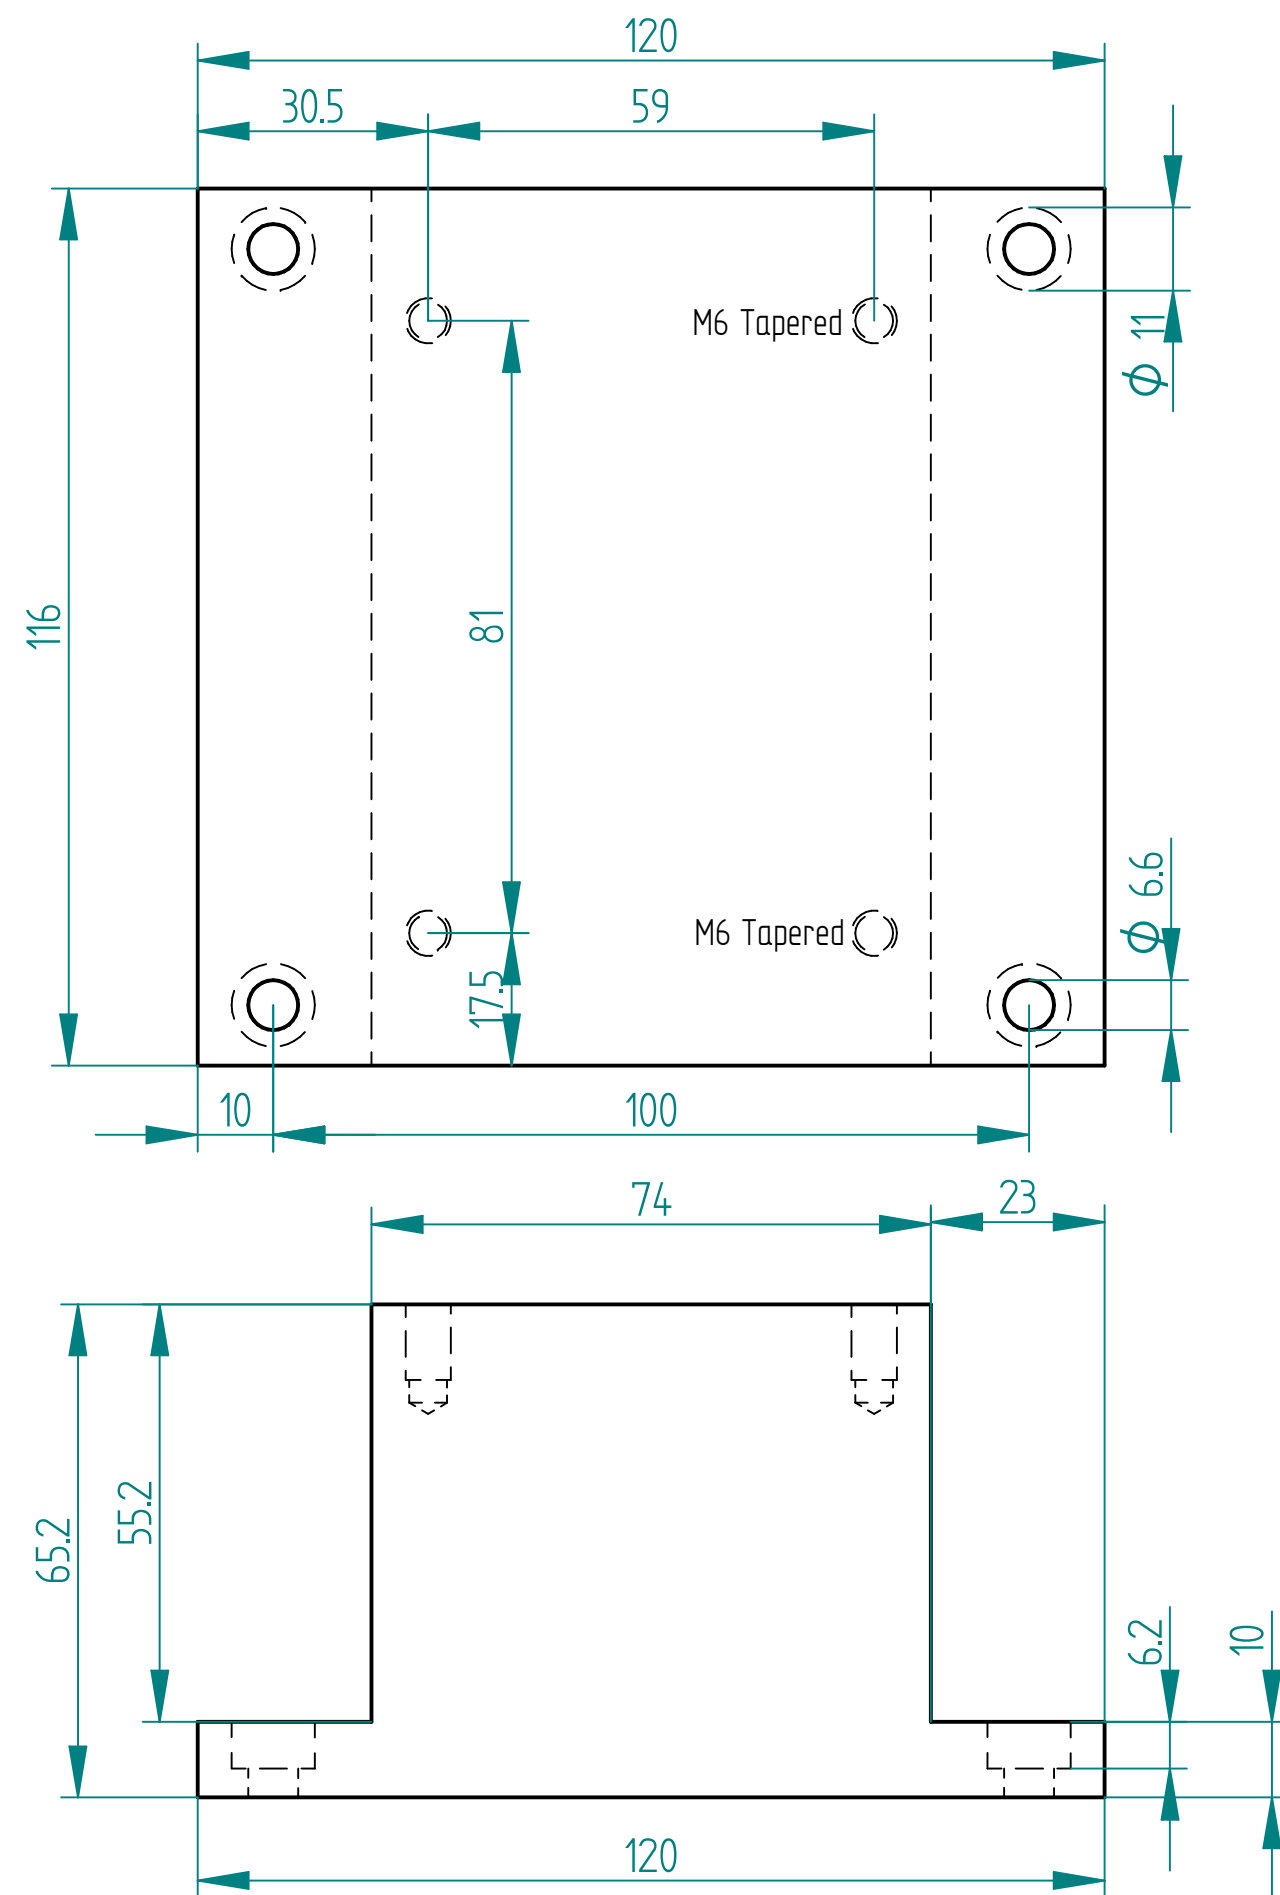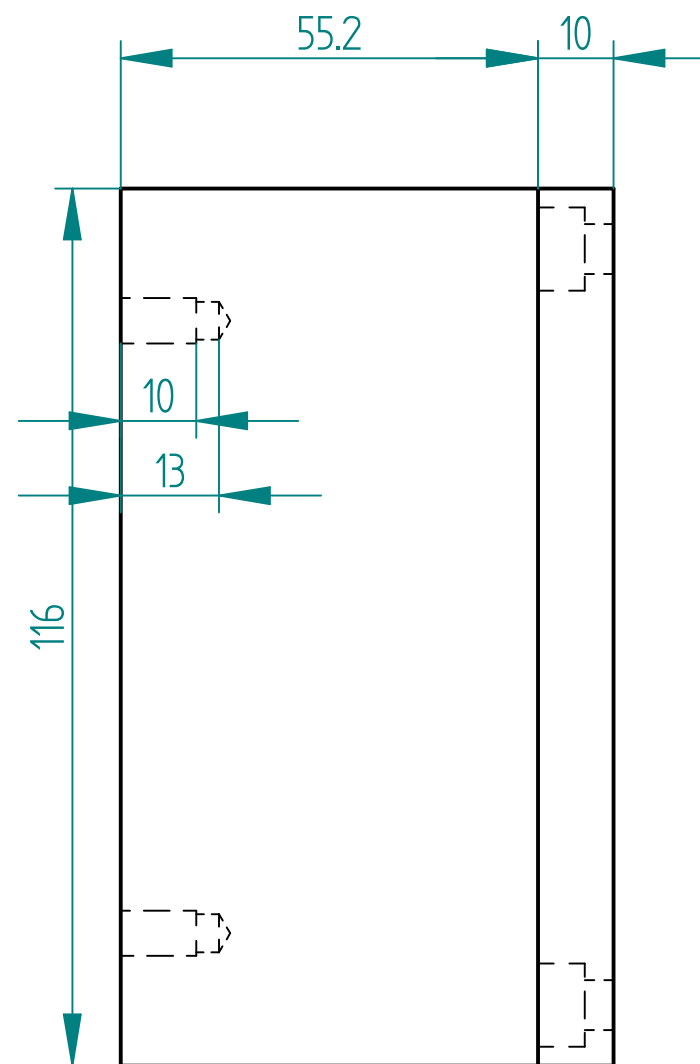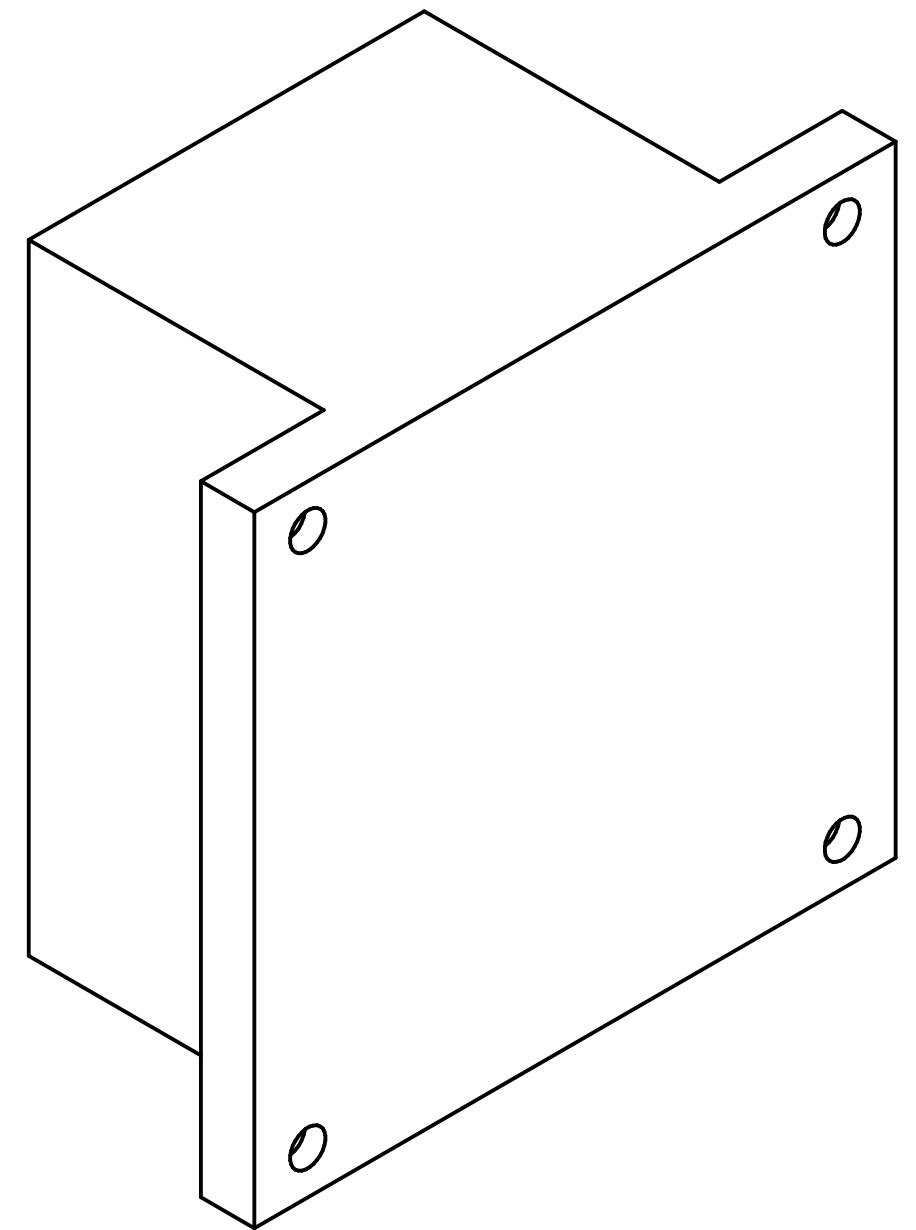

20-LBMM-JP-010

| 1                                                                                     |                        |                                          |             |                           |
|---------------------------------------------------------------------------------------|------------------------|------------------------------------------|-------------|---------------------------|
| 1                                                                                     | 4                      | Laserblock M Series base                 | Aluminium   | 116 mm x 120 mm x 65.2 mm |
| Rep                                                                                   | Quantité               | Denomination                             | Matiere     | Dimension                 |
| Nom Resp.                                                                             | Jatin Panwar           |                                          | Nom         | Date                      |
| Téléphone                                                                             | +41789264420           | Projet                                   | Workstation |                           |
| Laboratoire                                                                           | LBMM                   | Dessiné                                  |             | 03.07.2020                |
| Prof. resp.                                                                           | Prof. Christoph Merten | Modifié                                  |             |                           |
|  |                        | Denomination<br>Laserblock M Series base |             | Numero dessin<br>7        |
