# Supplementary material for: Design and construction of a microfluidics workstation for high-throughput multi-wavelength fluorescence and transmittance activated droplet analysis and sorting
Source: Springer Nature journal article supplement (doi:10.1038/s41596-022-00796-2), 2023-01-27
Supplement: MOESM19 [file 41596_2022_796_MOESM19_ESM58.zip]

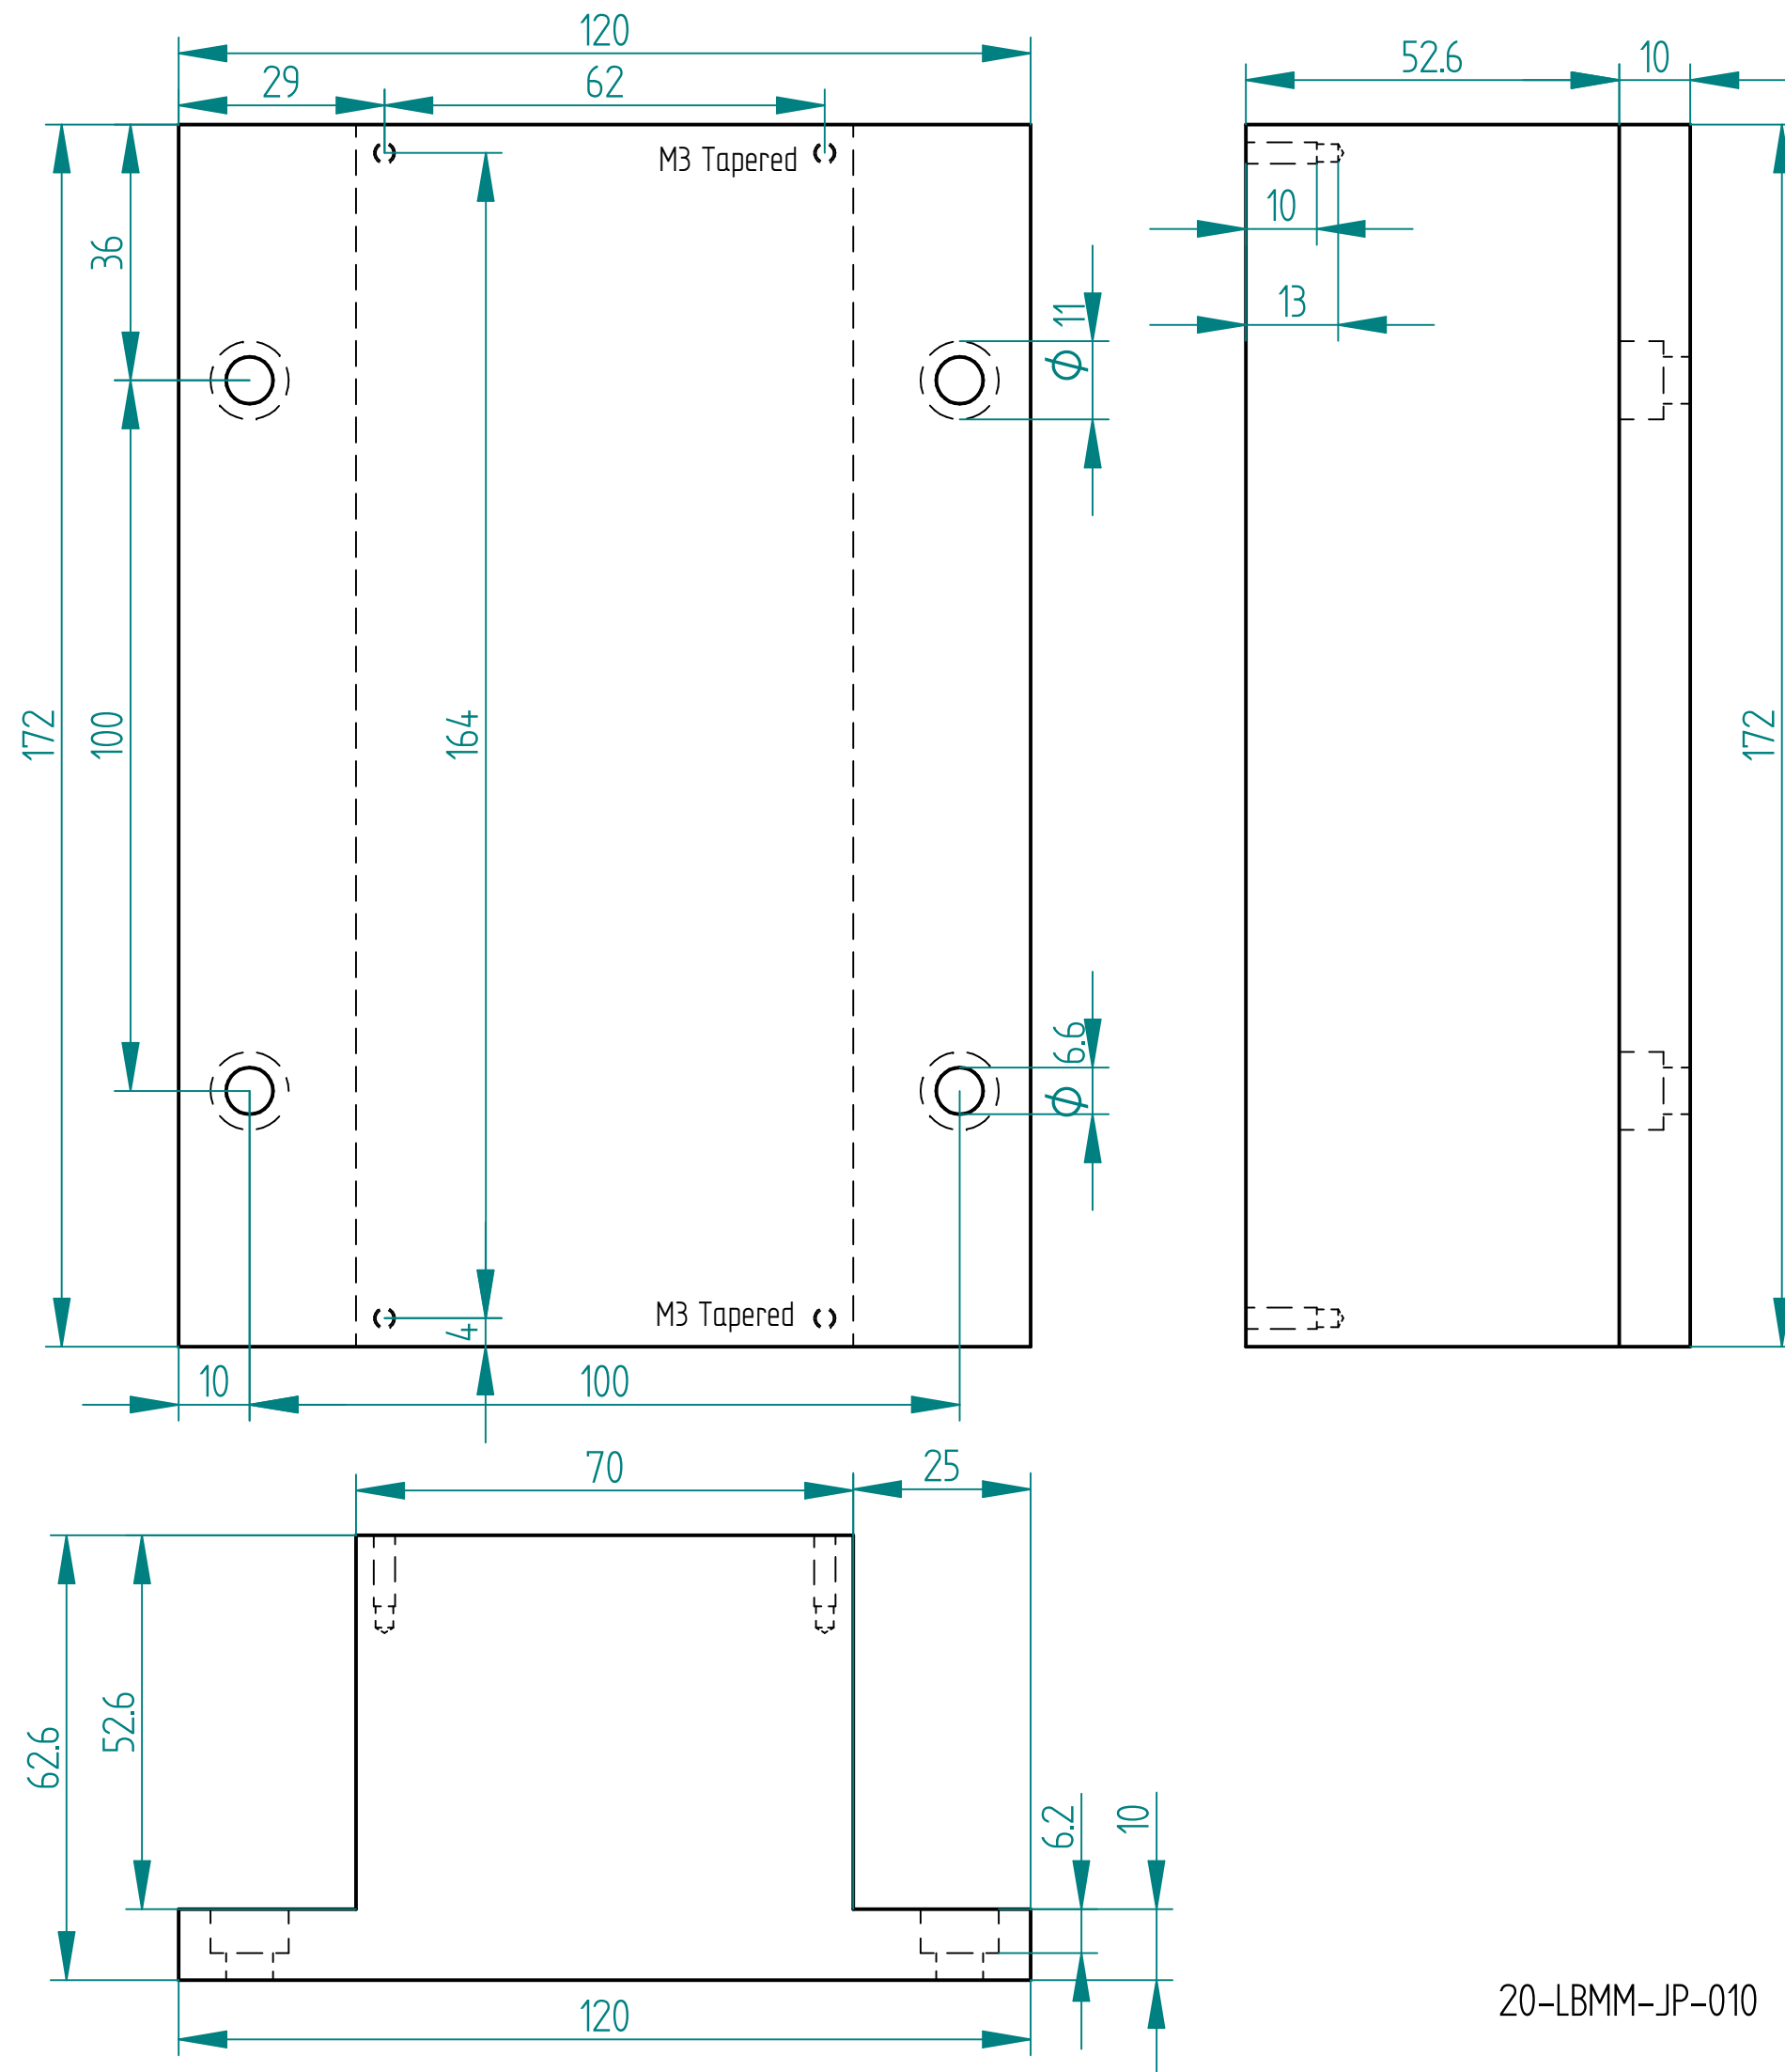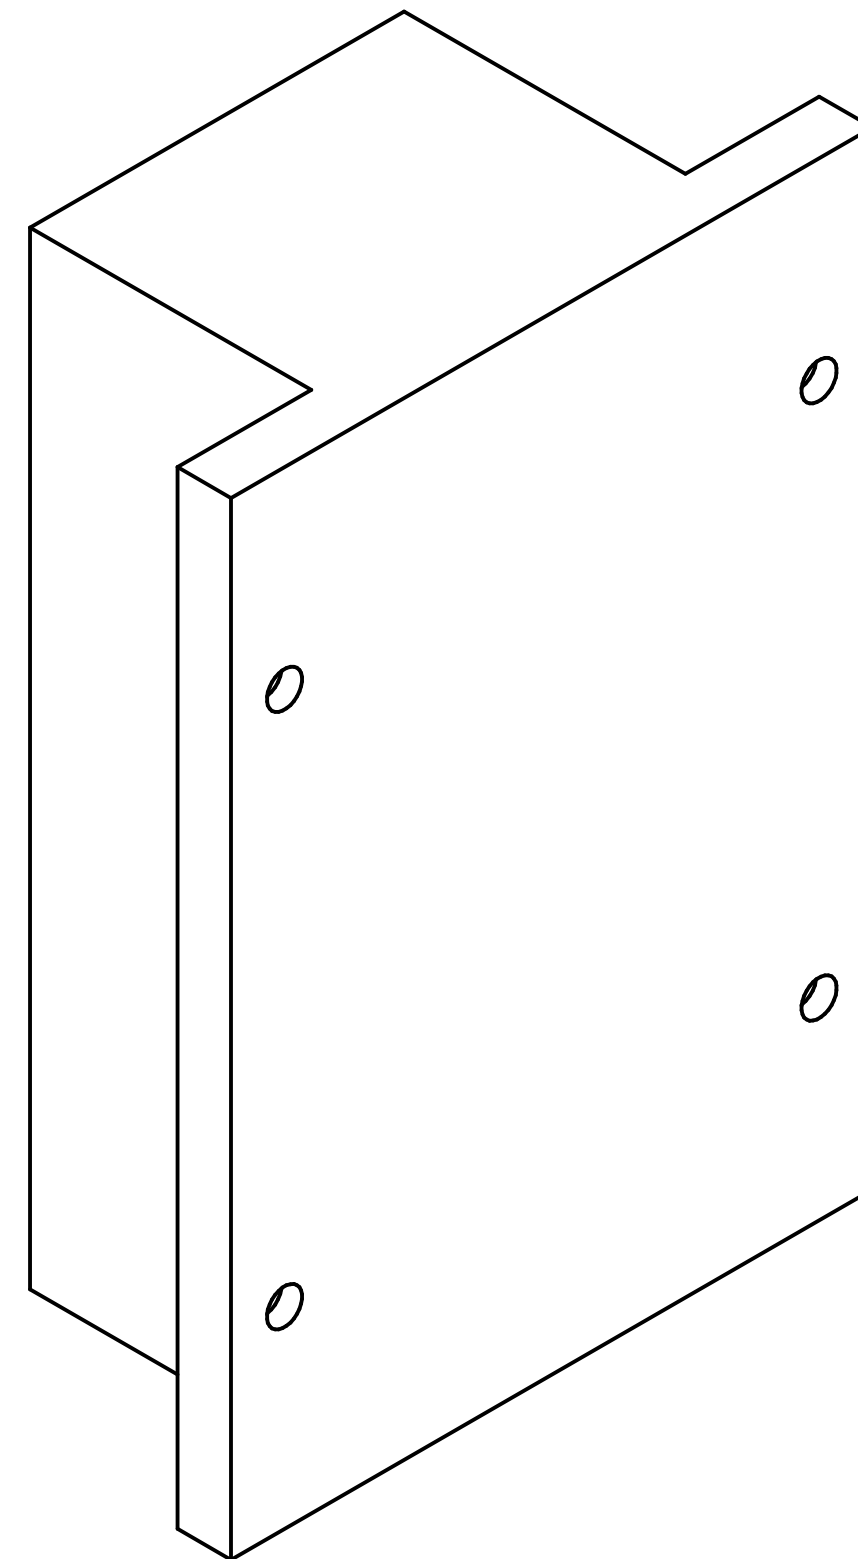

20-LBMM-JP-010

|                                                                                       |                        |                           |             |                           |
|---------------------------------------------------------------------------------------|------------------------|---------------------------|-------------|---------------------------|
| 1                                                                                     |                        |                           |             |                           |
| 1                                                                                     | 8                      | Laserblock FN Series base | Aluminium   | 172 mm x 120 mm x 62.6 mm |
| Rep                                                                                   | Quantité               | Denomination              | Matiere     | Dimension                 |
| Nom Resp.                                                                             | Jatin Panwar           |                           | Nom         |                           |
| Téléphone                                                                             | +41789264420           | Projet                    | Workstation |                           |
| Laboratoire                                                                           | LBMM                   | Dessiné                   |             | 03.07.20                  |
| Prof. resp.                                                                           | Prof. Christoph Merten | Modifié                   |             |                           |
|  |                        | Denomination              |             | Numero dessin             |
|                                                                                       |                        | Laserblock FN Series base |             | 6                         |
