# Supplementary material for: Design and construction of a microfluidics workstation for high-throughput multi-wavelength fluorescence and transmittance activated droplet analysis and sorting
Source: Springer Nature journal article supplement (doi:10.1038/s41596-022-00796-2), 2023-01-27
Supplement: MOESM20 [file 41596_2022_796_MOESM20_ESM59.zip]

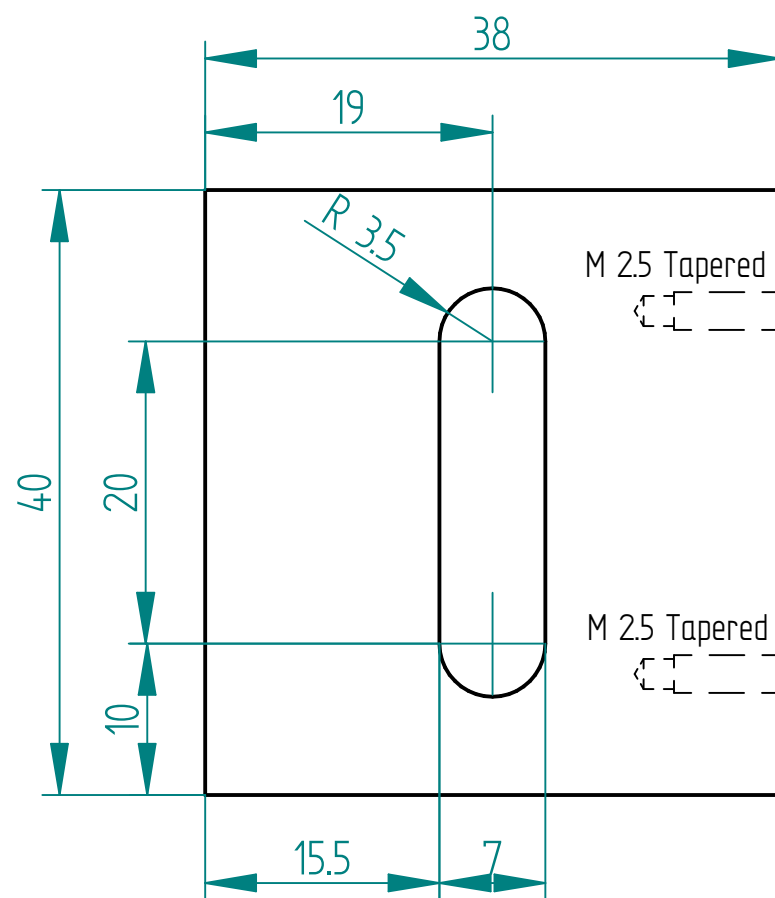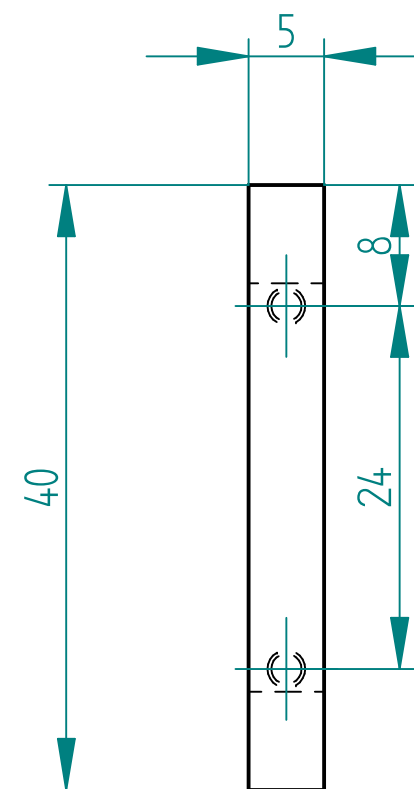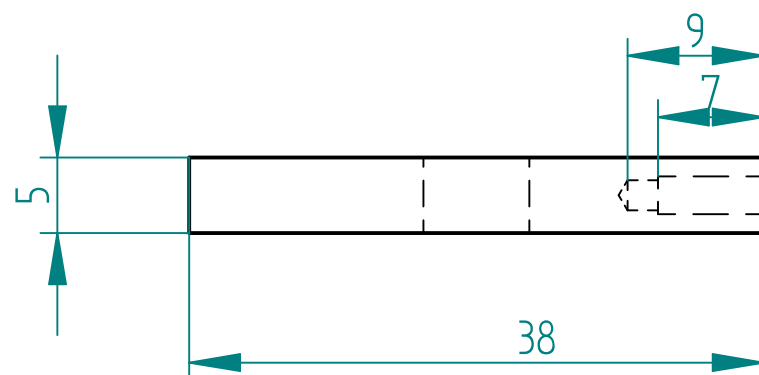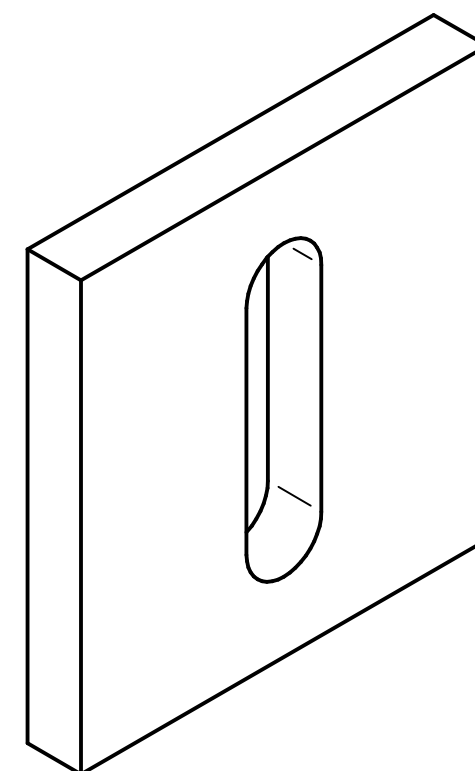

20-LBMM-JP-010

| 1                                                                                     |                        |                 |             |                      |
|---------------------------------------------------------------------------------------|------------------------|-----------------|-------------|----------------------|
| 1                                                                                     | 15                     | PMT mount part2 | Aluminium   | 40 mm x 38 mm x 5 mm |
| Rep                                                                                   | Quantité               | Denomination    | Matiere     | Dimension            |
| Nom Resp.                                                                             | Jatin Panwar           |                 | Nom         | Date                 |
| Téléphone                                                                             | +41789264420           | Projet          | Workstation |                      |
| Laboratoire                                                                           | LBMM                   | Dessiné         |             | 12.07.2020           |
| Prof. resp.                                                                           | Prof. Christoph Merten | Modifié         |             |                      |
|  |                        | Denomination    |             | Numero dessin        |
|                                                                                       |                        | PMT mount part2 |             | 10                   |
