# Supplementary material for: Design and construction of a microfluidics workstation for high-throughput multi-wavelength fluorescence and transmittance activated droplet analysis and sorting
Source: Springer Nature journal article supplement (doi:10.1038/s41596-022-00796-2), 2023-01-27
Supplement: MOESM21 [file 41596_2022_796_MOESM21_ESM60.zip]

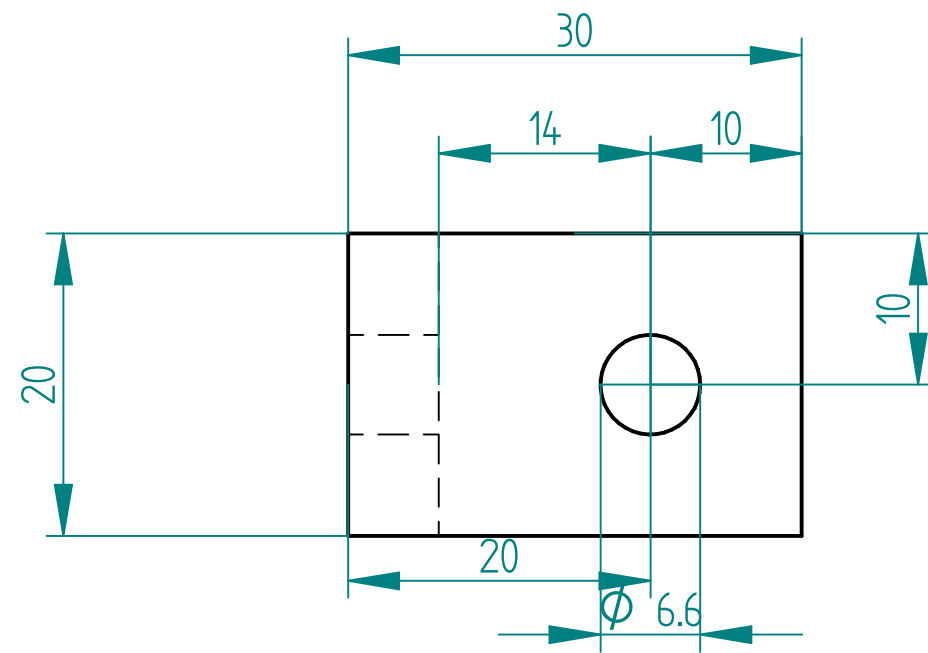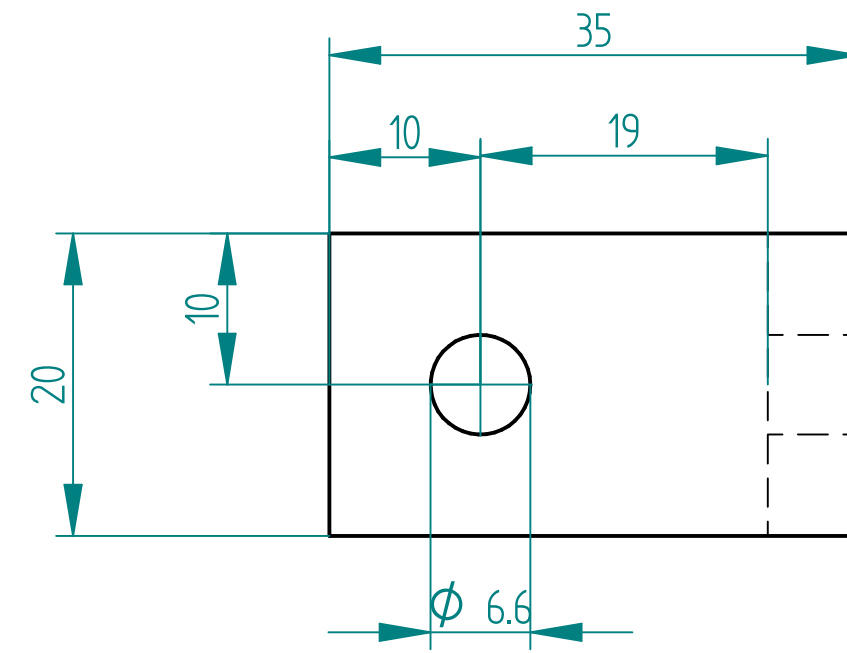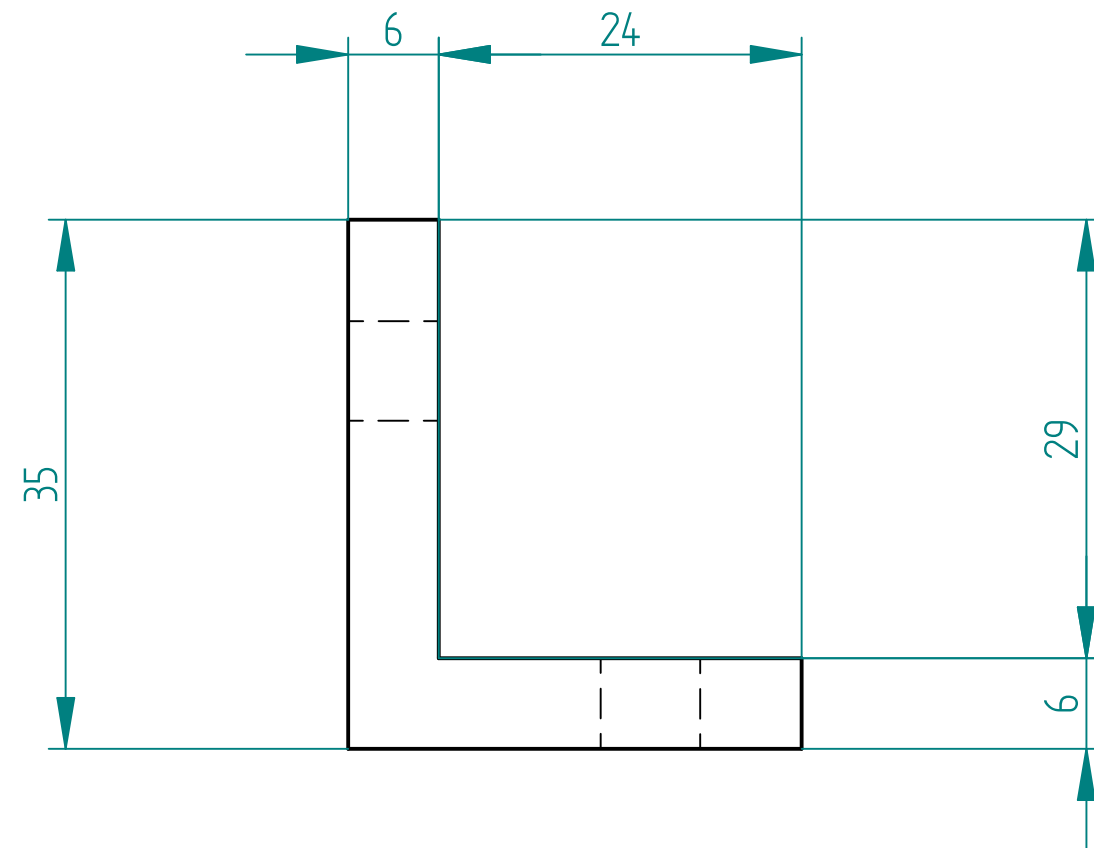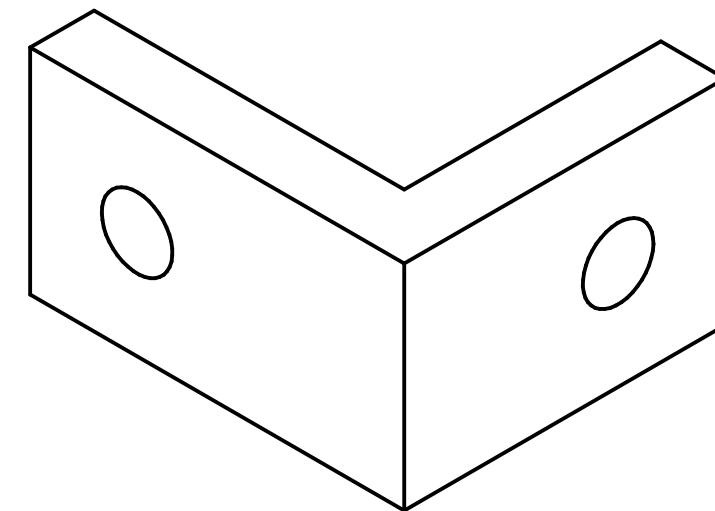

20-LBMM-JP-010

| 1                                                                                     |                        |                       |             |                       |
|---------------------------------------------------------------------------------------|------------------------|-----------------------|-------------|-----------------------|
| 1                                                                                     | 10                     | Angle                 | Aluminium   | 20 mm x 30 mm x 35 mm |
| Rep                                                                                   | Quantité               | Denomination          | Matiere     | Dimension             |
| Nom Resp.                                                                             | Jatin Panwar           |                       | Nom         | Date                  |
| Téléphone                                                                             | +41789264420           | Projet                | Workstation |                       |
| Laboratoire                                                                           | LBMM                   | Dessiné               |             | 03.07.2020            |
| Prof. resp.                                                                           | Prof. Christoph Merten | Modifié               |             |                       |
|  |                        | Denomination<br>Angle |             | Numero dessin<br>4    |

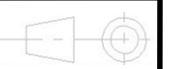

Echelle 2:1
