# Supplementary material for: Design and construction of a microfluidics workstation for high-throughput multi-wavelength fluorescence and transmittance activated droplet analysis and sorting
Source: Springer Nature journal article supplement (doi:10.1038/s41596-022-00796-2), 2023-01-27
Supplement: MOESM21 [file 41596_2022_796_MOESM21_ESM60.zip]

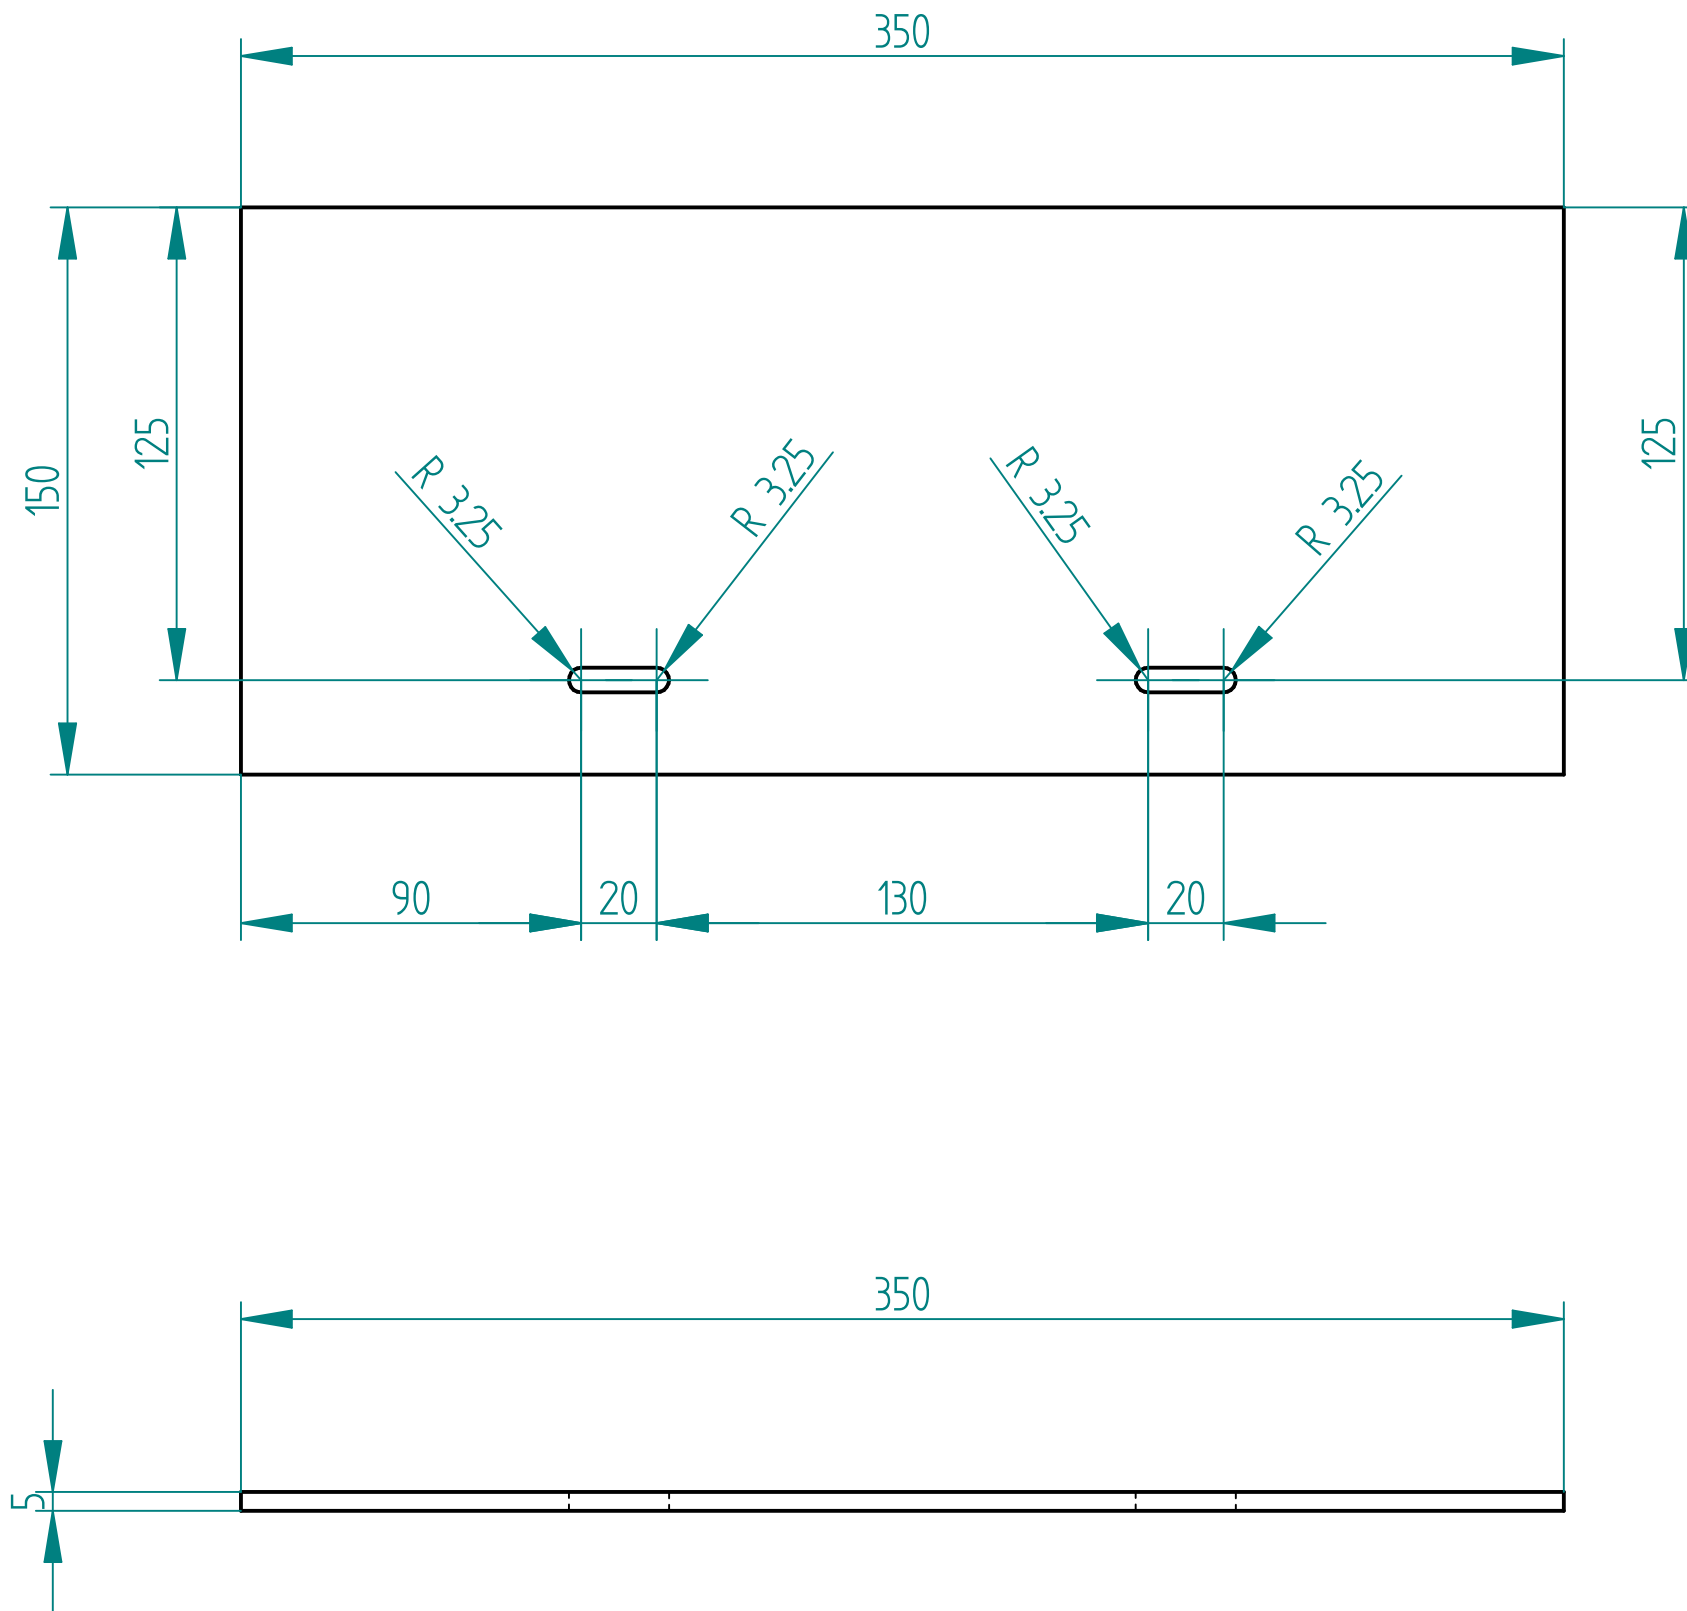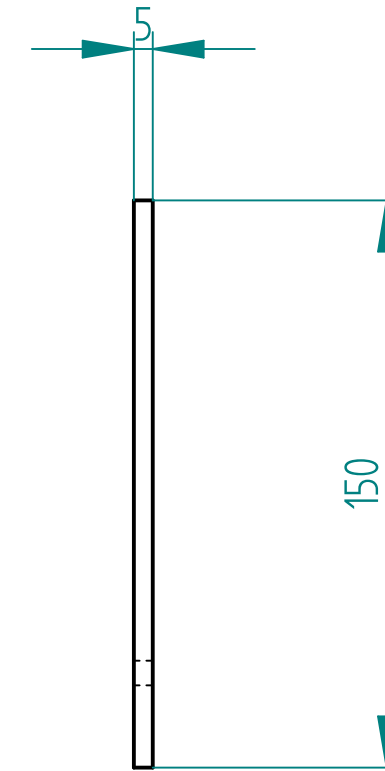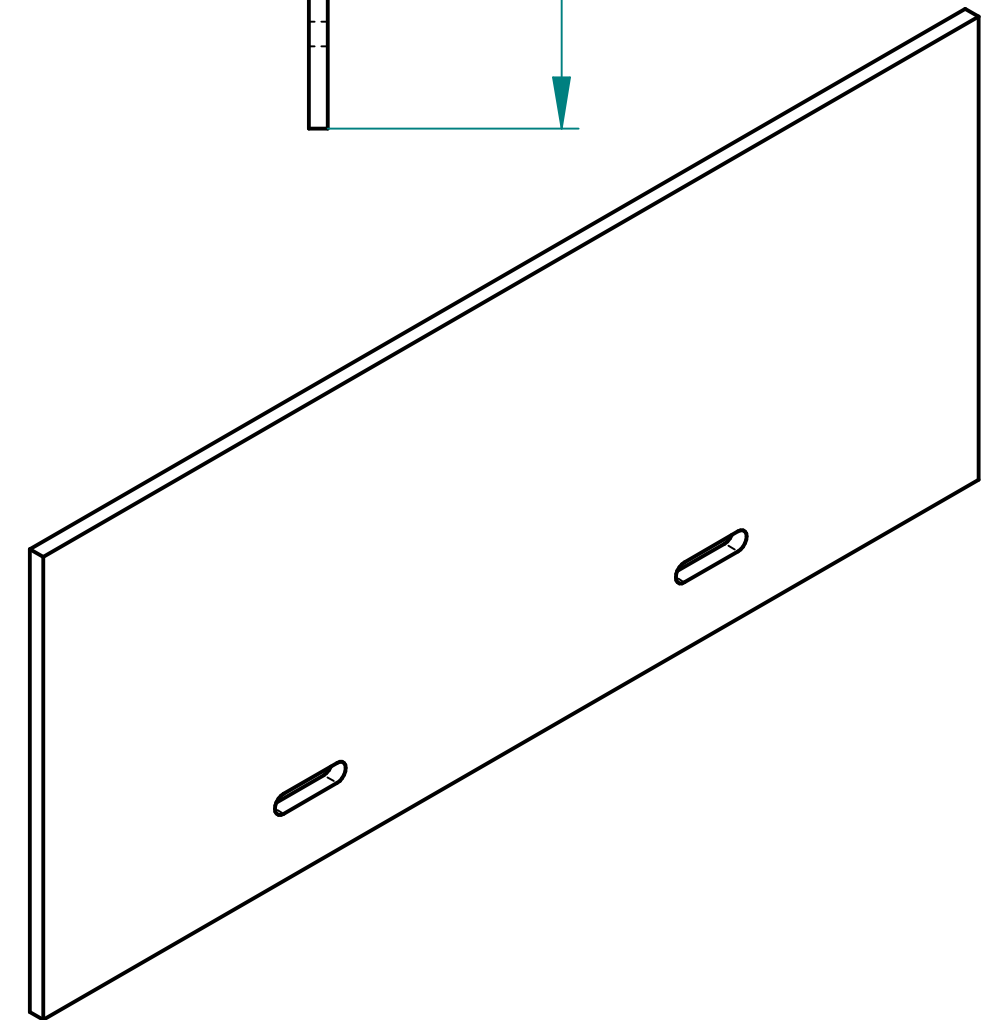

| 1                                                                                     |                        |                                     |             |                        |
|---------------------------------------------------------------------------------------|------------------------|-------------------------------------|-------------|------------------------|
| 1                                                                                     | 4                      | Light barrier part2                 | Black POM   | 350 mm x 150 mm x 5 mm |
| Rep                                                                                   | Quantité               | Denomination                        | Matiere     | Dimension              |
| Nom Resp.                                                                             | Jatin Panwar           |                                     | Nom         | Date                   |
| Téléphone                                                                             | +41789264420           | Projet                              | Workstation |                        |
| Laboratoire                                                                           | LBMM                   | Dessiné                             |             | 38.08.2020             |
| Prof. resp.                                                                           | Prof. Christoph Merten | Modifié                             |             |                        |
|  |                        | Denomination<br>Light barrier part2 |             | Numero dessin<br>4     |

20-LBMM-JP-010
