# Supplementary material for: Design and construction of a microfluidics workstation for high-throughput multi-wavelength fluorescence and transmittance activated droplet analysis and sorting
Source: Springer Nature journal article supplement (doi:10.1038/s41596-022-00796-2), 2023-01-27
Supplement: MOESM21 [file 41596_2022_796_MOESM21_ESM60.zip]

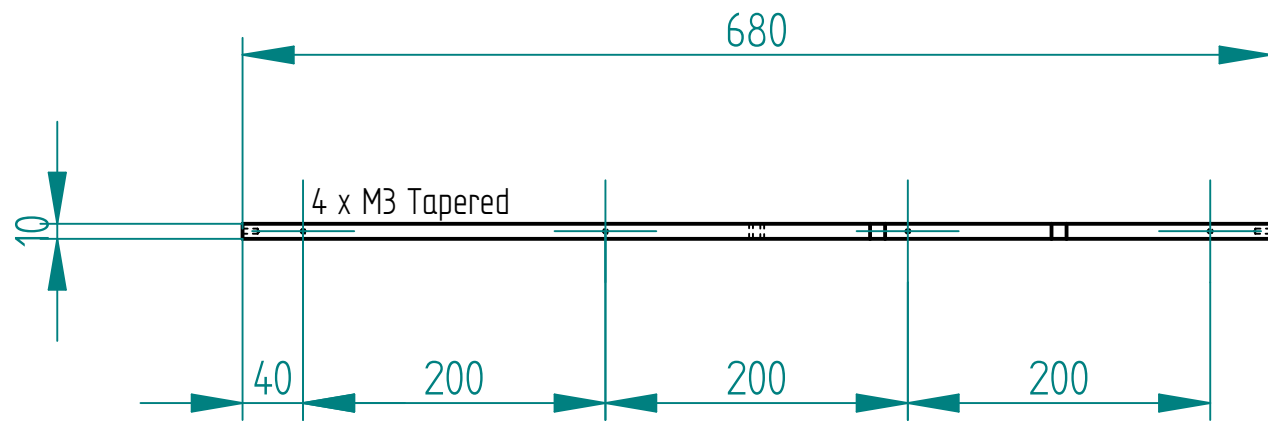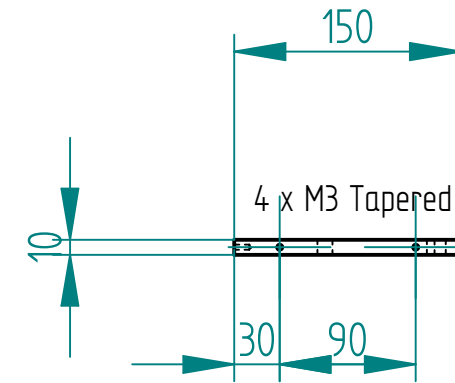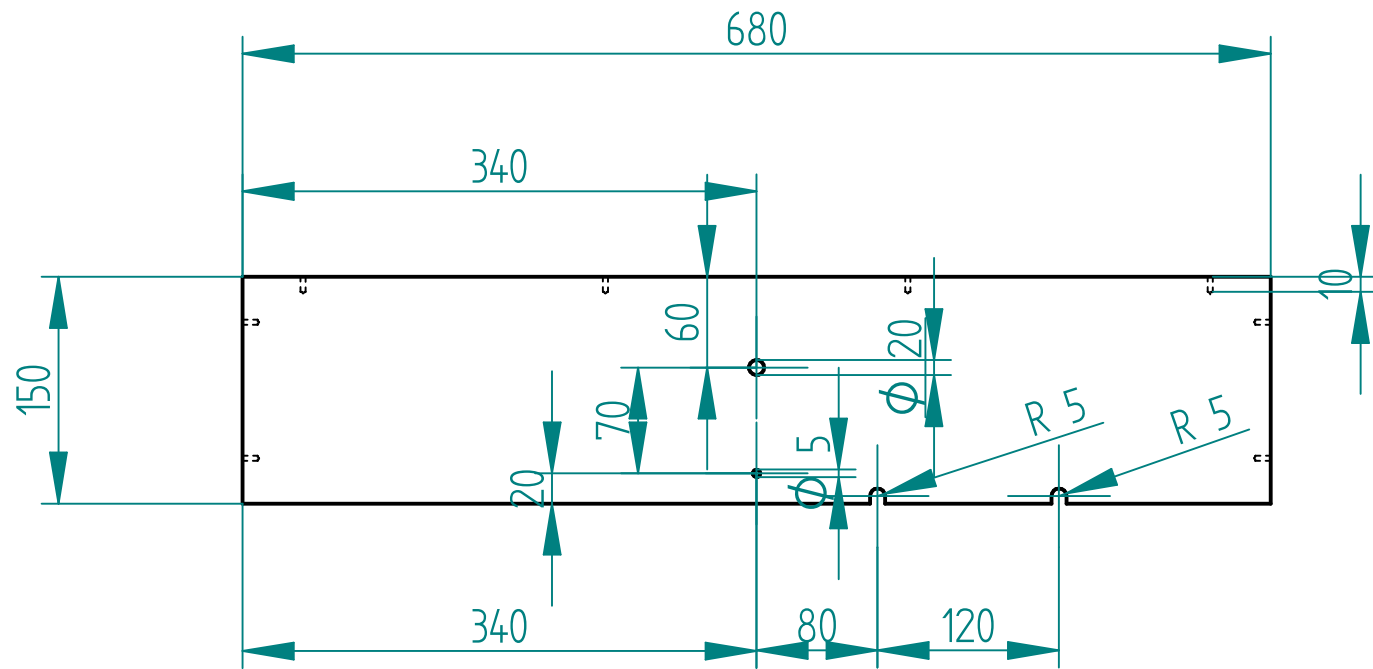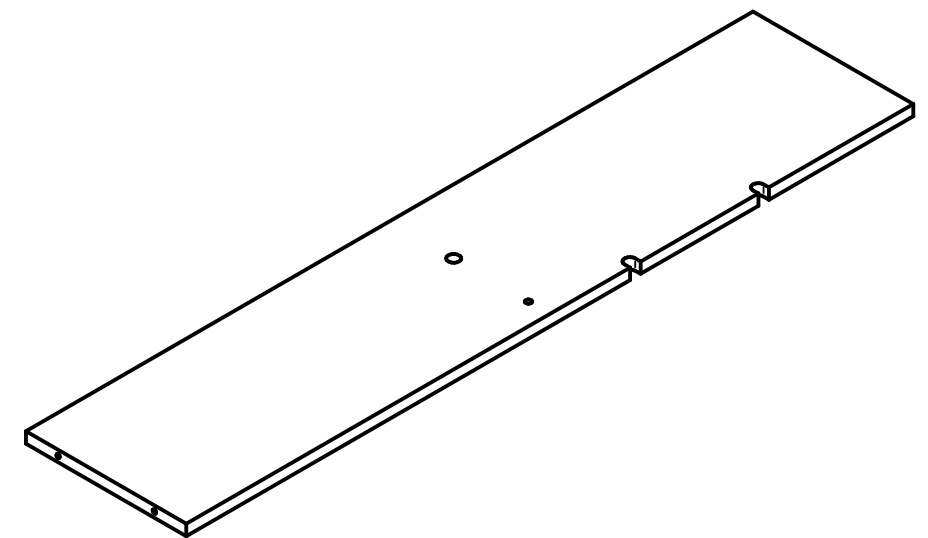

|                                                                                       |                        |              |             |                         |
|---------------------------------------------------------------------------------------|------------------------|--------------|-------------|-------------------------|
| 1                                                                                     |                        |              |             |                         |
| 1                                                                                     | 4                      | Front plate  | Aluminium   | 680 mm x 150 mm x 10 mm |
| Rep                                                                                   | Quantité               | Dénomination | Matériau    | Dimension               |
| Nom Resp.                                                                             | Jatin Panwar           |              | Nom         | Date                    |
| Téléphone                                                                             | +41789264420           | Projet       | Workstation |                         |
| Laboratoire                                                                           | LBMM                   | Dessiné      |             | 28.08.2020              |
| Prof. resp.                                                                           | Prof. Christoph Merten | Modifié      |             |                         |
|  |                        | Dénomination |             | Numero dessin           |
|                                                                                       |                        | Front plate  |             | 2                       |

20-LBMM-JP-010
