# Supplementary material for: Design and construction of a microfluidics workstation for high-throughput multi-wavelength fluorescence and transmittance activated droplet analysis and sorting
Source: Springer Nature journal article supplement (doi:10.1038/s41596-022-00796-2), 2023-01-27
Supplement: MOESM21 [file 41596_2022_796_MOESM21_ESM60.zip]

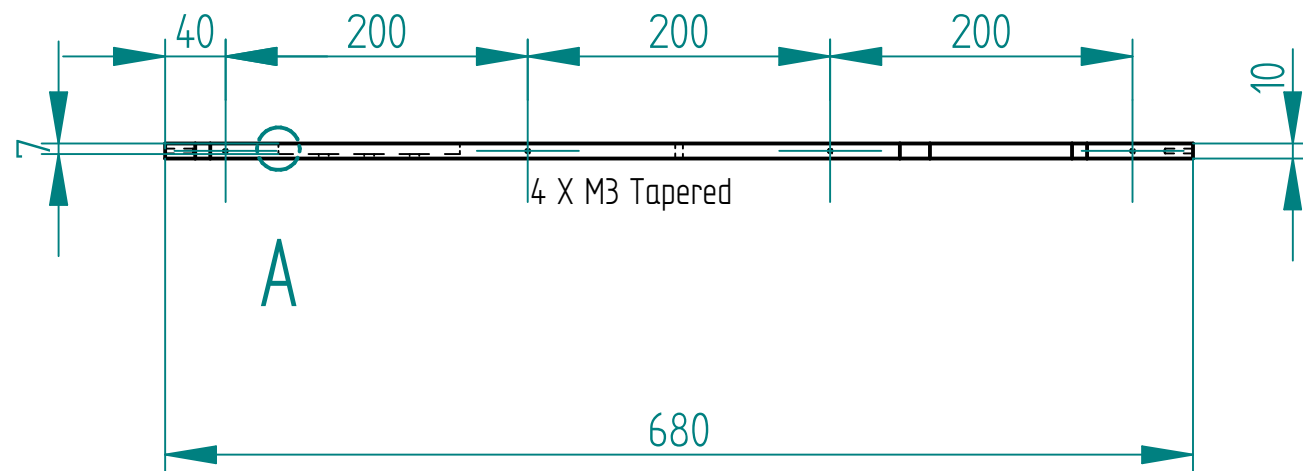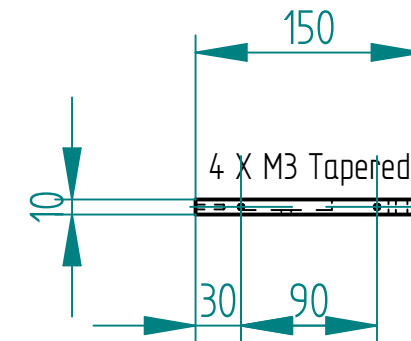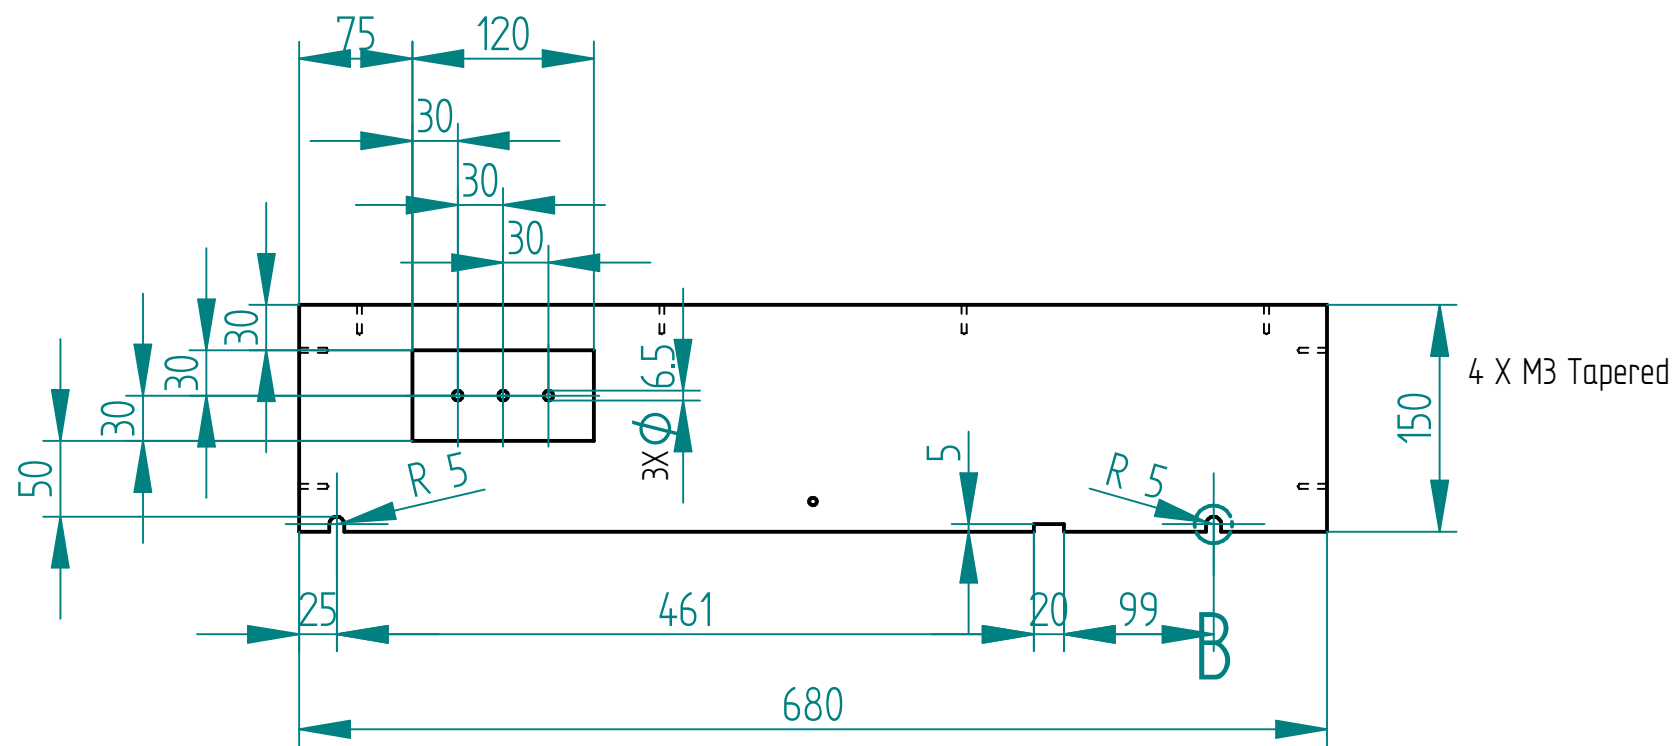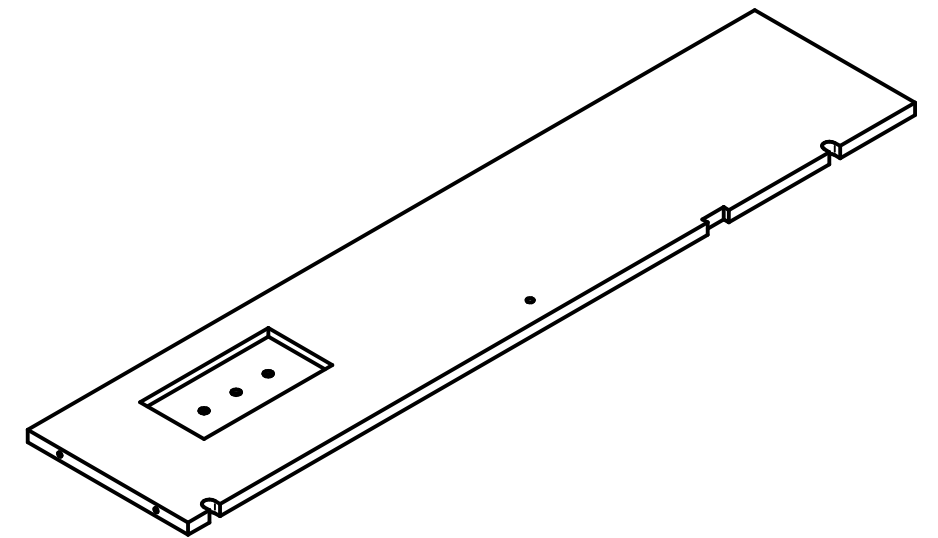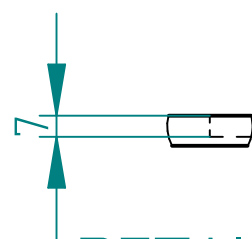

DETAIL A

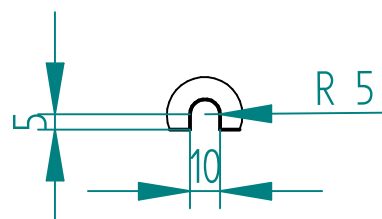

DETAIL B

20-LBMM-JP-010

| 1                                                                                     |                        |                            |             |                         |
|---------------------------------------------------------------------------------------|------------------------|----------------------------|-------------|-------------------------|
| 1                                                                                     | 4                      | Back Plate                 | Black POM   | 680 mm x 150 mm x 10 mm |
| Rep                                                                                   | Quantité               | Denomination               | Matiere     | Dimension               |
| Nom Resp.                                                                             | Jatin Panwar           |                            | Nom         | Date                    |
| Téléphone                                                                             | +41789264420           | Projet                     | Workstation |                         |
| Laboratoire                                                                           | LBMM                   | Dessiné                    |             | 28.08.2020              |
| Prof. resp.                                                                           | Prof. Christoph Merten | Modifié                    |             |                         |
|  |                        | Denomination<br>Back Plate |             | Numero dessin<br>1      |
