# Supplementary material for: Design and construction of a microfluidics workstation for high-throughput multi-wavelength fluorescence and transmittance activated droplet analysis and sorting
Source: Springer Nature journal article supplement (doi:10.1038/s41596-022-00796-2), 2023-01-27
Supplement: MOESM26 [file 41596_2022_796_MOESM26_ESM65.xlsx]

## Sheet: Monodisperse
PMT1_width	PMT1_amp
1.42247	450.439
1.45728	462.646
1.41813	462.036
1.40072	444.946
1.43988	457.153
1.46162	473.022
1.42247	453.796
1.40508	456.848
1.42683	455.933
1.44857	464.478
1.41813	458.069
1.37898	439.758
1.40072	455.017
1.43988	468.14
1.40508	455.017
1.38767	439.453
1.42683	455.322
1.45293	470.581
1.40942	452.881
1.40072	454.712
1.40942	457.153
1.44423	467.834
1.41813	454.712
1.38332	442.81
1.43552	451.355
1.45728	466.614
1.42683	453.491
1.40508	434.265
1.40072	435.486
1.44423	462.646
1.44423	461.731
1.38767	446.472
1.40942	456.238
1.45293	468.445
1.42683	452.881
1.41378	446.777
1.40508	453.186
1.47033	473.328
1.46162	470.581
1.38767	444.946
1.40942	453.491
1.44857	464.783
1.43552	460.205
1.41378	448.914
1.42247	452.881
1.44423	466.309
1.41813	457.458
1.39637	443.42
1.42247	454.712
1.45293	468.75
1.45293	461.731
1.40942	451.66
1.40072	450.439
1.44857	468.14
1.46598	469.666
1.41378	447.083
1.43988	456.543
1.47033	468.14
1.43552	457.764
1.40508	446.167
1.40508	443.726
1.45728	464.478
1.44423	465.393
1.40072	451.66
1.39203	444.031
1.44857	472.107
1.41813	458.374
1.40942	444.946
1.41378	453.186
1.45293	464.478
1.43988	464.172
1.40072	439.148
1.38332	447.693
1.46162	474.548
1.45293	461.426
1.42247	447.998
1.40072	444.641
1.46162	466.003
1.45293	459.9
1.41813	454.712
1.40942	452.271
1.46598	470.276
1.44423	456.543
1.41378	440.369
1.42683	454.102
1.44423	456.238
1.43988	457.153
1.41813	447.998
1.37898	439.453
1.47033	471.802
1.44857	463.867
1.41378	447.083
1.40508	451.355
1.40942	453.186
1.41813	458.069
1.38767	451.66
1.38767	447.083
1.45293	471.497
1.42247	460.205
1.38767	448.914
1.41378	455.322
1.45728	472.412
1.44857	466.309
1.39203	448.303
1.39637	444.641
1.47467	467.834
1.44423	455.322
1.40072	445.251
1.41813	457.153
1.45728	467.529
1.43118	464.172
1.39637	448.914
1.41813	451.965
1.45293	481.873
1.41813	464.478
1.37898	439.758
1.41378	450.134
1.43552	462.341
1.41813	460.51
1.38767	444.641
1.40508	462.341
1.43118	471.497
1.39203	445.557
1.38767	447.083
1.41378	468.445
1.42683	473.328
1.39637	451.66
1.41813	455.017
1.42247	462.646
1.44857	466.919
1.40508	454.407
1.41378	457.764
1.44857	469.666
1.41378	455.627
1.37898	451.965
1.39637	442.2
1.43552	465.698
1.42683	458.374
1.40072	452.271
1.40508	453.491
1.44857	471.191
1.40072	452.576
1.38767	449.524
1.38767	448.914
1.43552	467.529
1.40508	458.984
1.37462	449.524
1.41813	456.238
1.43552	464.172
1.36593	442.505
1.37898	448.303
1.40508	455.017
1.43988	473.328
1.38767	447.388
1.41378	459.595
1.41378	461.731
1.43988	466.919
1.37462	438.232
1.40942	451.05
1.44857	466.614
1.44857	469.36
1.37462	447.388
1.41378	455.017
1.44423	470.276
1.41813	458.679
1.37898	438.232
1.39637	451.965
1.42683	467.224
1.42247	457.153
1.35722	440.063
1.42247	469.666
1.41378	468.75
1.41378	458.679
1.38767	444.641
1.41813	459.29
1.45728	477.295
1.39203	448.303
1.39637	450.134
1.44857	468.75
1.45293	464.172
1.40942	456.848
1.40072	451.66
1.43988	462.036
1.44857	468.445
1.37898	447.693
1.40508	450.134
1.41378	469.055
1.43552	462.646
1.38332	444.946
1.40072	442.81
1.43118	471.802
1.43118	467.834
1.36593	438.843
1.40942	459.9
1.43988	473.938
1.42683	469.055
1.37027	436.707
1.40942	454.102
1.41813	461.121
1.39637	469.055
1.37462	445.557
1.43118	461.731
1.41378	457.764
1.38767	445.251
1.37898	445.862
1.43118	463.257
1.42683	466.309
1.39203	447.388
1.40508	451.66
1.43988	458.679
1.42683	456.848
1.39637	449.829
1.37898	442.2
1.43988	471.191
1.43988	457.458
1.40942	450.439
1.37898	437.622
1.42247	467.224
1.41378	473.022
1.39203	456.543
1.38332	451.66
1.43118	459.29
1.40942	460.815
1.39203	450.439
1.40508	458.069
1.43118	477.295
1.42247	470.276
1.38767	454.407
1.42683	460.815
1.43118	471.802
1.42247	462.036
1.38767	445.862
1.43118	459.595
1.45293	475.159
1.39637	457.153
1.39203	452.271
1.43552	462.646
1.42683	466.309
1.39637	449.219
1.37027	445.251
1.43118	466.309
1.42247	460.815
1.39637	456.238
1.39203	451.05
1.43552	472.107
1.39637	464.172
1.37898	448.303
1.36593	448.303
1.45293	477.905
1.40072	457.764
1.36593	451.355
1.39637	456.238
1.41813	466.919
1.37462	447.083
1.37898	447.693
1.40942	459.29
1.46162	476.99
1.40942	457.458
1.38332	450.134
1.40072	457.153
1.44857	477.295
1.40942	457.764
1.39203	447.693
1.41378	459.29
1.42683	469.36
1.38767	447.693
1.39203	454.102
1.44857	474.854
1.41378	465.088
1.39637	451.965
1.37898	445.862
1.43118	470.276
1.40072	457.153
1.36593	447.388
1.40508	457.153
1.42683	464.478
1.39203	458.679
1.37027	452.881
1.39637	455.933
1.43988	470.581
1.38332	452.576
1.40072	455.627
1.42247	464.783
1.41813	469.36
1.37462	442.81
1.38332	451.965
1.40508	457.764
1.43118	464.478
1.37898	443.42
1.38767	451.355
1.43118	467.224
1.41378	462.036
1.37462	441.284
1.40942	457.764
1.40508	465.393
1.41813	466.003
1.38332	447.693
1.42247	464.783
1.40508	460.815
1.38332	454.712
1.38767	456.543
1.41378	461.426
1.40072	462.036
1.39203	454.712
1.39203	455.933
1.43988	473.328
1.40508	467.834
1.37027	445.862
1.38767	449.829
1.42247	468.14
1.40508	462.646
1.37027	444.946
1.39203	452.576
1.44857	473.633
1.40072	457.764
1.36157	446.167
1.41378	462.952
1.41378	455.017
1.39203	455.017
1.38332	444.946
1.43118	462.952
1.41378	467.529
1.36157	446.167
1.37898	452.576
1.42683	462.952
1.41378	459.595
1.35722	446.167
1.37027	452.271
1.41378	469.971
1.40508	462.036
1.36593	446.777
1.41813	459.9
1.42683	473.022
1.40508	449.829
1.39203	452.576
1.40072	459.595
1.41378	460.815
1.38767	445.557
1.36593	446.472
1.41813	461.121
1.40072	459.9
1.38767	448.914
1.38332	456.238
1.45293	479.431
1.41813	463.867
1.38332	457.153
1.38767	449.524
1.44423	474.243
1.38767	455.933
1.37027	451.355
1.41378	466.614
1.41378	466.003
1.36593	459.29
1.37898	452.576
1.42247	469.666
1.42247	477.295
1.36593	452.271
1.40072	462.341
1.43118	475.464
1.40508	458.984
1.37462	438.232
1.38767	450.745
1.43552	475.159
1.39203	456.848
1.37027	448.914
1.42247	457.764
1.43552	471.191
1.38767	456.238
1.39203	455.627
1.40072	459.9
1.41813	466.614
1.36157	443.42
1.37027	451.965
1.42683	459.29
1.40942	464.783
1.36157	444.946
1.39203	461.731
1.40508	467.224
1.38767	459.595
1.35722	445.251
1.40508	470.276
1.41813	473.022
1.39637	455.933
1.39637	457.764
1.43118	469.971
1.40508	455.933
1.39637	451.05
1.38767	447.693
1.45728	475.464
1.42247	469.055
1.37898	444.946
1.39203	454.102
1.41813	465.088
1.40508	455.017
1.35722	441.895
1.40508	461.731
1.42683	471.802
1.39203	450.134
1.36157	443.115
1.40942	457.153
1.40508	466.309
1.37898	451.965
1.36593	446.472
1.43118	475.464
1.40072	454.712
1.36593	447.388
1.39203	458.679
1.42247	466.614
1.39637	455.017
1.39203	451.965
1.39637	456.848
1.43552	467.529
1.40942	455.017
1.38767	450.745
1.44857	474.854
1.41378	463.257
1.38332	452.881
1.37898	444.641
1.42683	470.886
1.41378	465.393
1.37462	446.777
1.38767	453.186
1.43552	469.36
1.37027	451.66
1.37462	444.336
1.39637	454.407
1.41378	466.309
1.38332	447.693
1.38767	458.374
1.43988	480.042
1.38332	451.05
1.35722	442.505
1.40508	462.341
1.43118	470.581
1.38332	458.374
1.36593	452.881
1.42683	471.802
1.41813	460.205
1.37898	444.946
1.40072	457.764
1.42247	469.971
1.40072	458.679
1.37462	445.557
1.40072	459.29
1.41813	471.802
1.39637	460.815
1.36157	444.946
1.40942	458.374
1.41378	469.055
1.37898	452.576
1.40942	462.646
1.41378	468.445
1.40072	454.712
1.37462	449.219
1.40942	466.003
1.39637	465.393
1.39203	456.543
1.37027	455.017
1.40508	472.412
1.41378	458.679
1.37898	448.914
1.38332	455.017
1.45293	480.347
1.40508	451.965
1.37898	454.102
1.38332	451.66
1.42683	474.243
1.38767	457.458
1.37462	446.167
1.43118	462.036
1.41813	474.243
1.37898	447.693
1.39203	451.965
1.41813	464.783
1.40508	462.036
1.37027	447.998
1.37898	455.017
1.42683	481.567
1.37898	447.083
1.37462	452.576
1.39637	456.238
1.43118	472.107
1.37462	446.777
1.37027	447.998
1.41378	468.14
1.42683	472.412
1.37462	443.726
1.40072	463.257
1.43988	469.36
1.43552	470.276
1.38332	458.984
1.40072	452.271
1.44423	476.379
1.41813	455.933
1.34852	438.538
1.41813	465.698
1.44423	470.886
1.38332	457.764
1.38332	442.81
1.40942	455.322
1.43552	467.834
1.36157	443.42
1.40942	455.933
1.42683	469.055
1.44423	473.328
1.34852	437.927
1.37027	451.05
1.41378	469.36
1.41813	465.698
1.37898	450.439
1.43118	460.51
1.42683	477.295
1.40072	464.478
1.38332	449.219
1.41378	457.153
1.42247	458.679
1.40508	452.881
1.38332	447.388
1.43552	463.867
1.44423	471.802
1.40942	461.426
1.37898	444.641
1.44423	468.445
1.42683	459.9
1.40508	451.05
1.39637	451.965
1.44423	463.257
1.43552	473.328
1.39203	457.153
1.40072	455.322
1.42683	462.952
1.39637	458.374
1.37898	458.374
1.40072	458.069
1.42247	466.614
1.41378	460.205
1.40072	457.764
1.42247	467.529
1.42247	461.731
1.40508	456.238
1.40508	448.303
1.41813	461.121
1.42683	469.666
1.39637	453.491
1.37462	443.115
1.43552	471.802
1.41813	465.088
1.39203	442.81
1.36593	442.505
1.43118	464.783
1.41813	463.257
1.37898	450.745
1.37462	443.115
1.44423	479.126
1.41378	463.562
1.37027	445.251
1.37462	443.115
1.45293	473.022
1.41378	462.341
1.38332	450.745
1.40072	451.965
1.46598	476.379
1.40072	451.66
1.36593	440.369
1.41378	449.219
1.43988	466.919
1.41378	459.595
1.38767	444.336
1.43118	462.646
1.46162	474.854
1.40072	449.524
1.39637	458.679
1.43118	476.379
1.41813	462.952
1.38767	451.66
1.40072	453.796
1.45293	476.99
1.42247	466.614
1.39203	447.693
1.39203	453.796
1.43118	466.614
1.40072	458.679
1.39637	451.66
1.37462	449.219
1.44857	471.802
1.38332	455.933
1.37462	450.439
1.39637	456.238
1.43988	470.581
1.39203	446.167
1.38767	450.745
1.40942	459.29
1.44423	476.074
1.39203	452.576
1.40942	453.491
1.44423	459.29
1.43552	467.224
1.37462	435.486
1.37898	447.693
1.41378	460.815
1.44857	470.276
1.36593	438.843
1.40508	453.491
1.43988	460.205
1.43988	465.088
1.38767	452.271
1.39637	447.693
1.42247	459.595
1.44857	471.802
1.39203	447.388
1.40942	457.153
1.44423	473.022
1.41813	463.257
1.41813	455.017
1.42247	459.595
1.44857	464.172
1.43118	463.562
1.37462	437.317
1.43118	455.322
1.45728	471.191
1.41813	465.698
1.41813	454.102
1.42247	455.322
1.47033	469.666
1.42683	458.984
1.39637	443.726
1.43118	458.374
1.45293	474.243
1.42683	454.712
1.39203	453.491
1.41378	463.867
1.44423	473.328
1.41813	462.646
1.37898	451.355
1.43988	468.75
1.45293	469.055
1.39637	451.355
1.40508	453.796
1.43552	466.309
1.44423	469.971
1.41813	462.036
1.39637	443.115
1.45293	475.159
1.45293	466.614
1.42247	455.933
1.41378	454.712
1.43118	463.562
1.44857	466.919
1.43118	450.439
1.40072	444.946
1.43988	459.29
1.44423	460.51
1.39203	453.796
1.42247	458.374
1.44857	462.646
1.45728	466.919
1.39203	450.134
1.39203	440.369
1.44857	461.731
1.45293	471.191
1.37898	447.388
1.40508	457.153
1.42683	459.595
1.41813	448.914
1.37898	445.251
1.40942	459.9
1.44857	469.666
1.44857	465.698
1.40072	447.388
1.40942	451.965
1.41813	456.848
1.42683	455.322
1.38767	442.505
1.39203	438.232
1.41813	456.238
1.44857	458.679
1.40942	443.726
1.43118	457.153
1.44857	463.867
1.44857	462.036
1.39637	451.66
1.40508	459.29
1.42247	459.595
1.43552	454.407
1.38767	441.895
1.39637	455.627
1.43118	460.51
1.43552	470.276
1.41813	454.102
1.42247	454.712
1.44423	468.445
1.43118	459.9
1.41378	452.576
1.43552	460.205
1.43118	463.867
1.43118	456.848
1.40508	454.407
1.40508	454.712
1.43988	459.29
1.44423	469.36
1.40942	447.998
1.40072	445.862
1.45293	466.309
1.44423	472.107
1.41378	449.829
1.42683	459.595
1.46598	478.21
1.41813	450.439
1.40508	448.914
1.40942	454.102
1.43118	465.698
1.43552	464.172
1.38332	440.979
1.40508	455.627
1.44857	473.938
1.44423	467.224
1.39637	444.641
1.42247	452.881
1.44423	458.679
1.44423	467.834
1.38767	441.284
1.43988	460.815
1.44857	458.679
1.44423	465.393
1.40072	448.303
1.41813	454.102
1.45728	466.003
1.45728	470.886
1.37027	441.895
1.41813	454.712
1.45293	468.75
1.43988	464.172
1.41378	451.355
1.43988	462.646
1.46598	467.834
1.44423	462.952
1.38767	438.843
1.40508	456.848
1.42683	470.886
1.42683	463.257
1.37027	433.655
1.40508	452.576
1.43118	465.698
1.43988	466.919
1.38767	439.758
1.44423	459.29
1.44423	458.374
1.42247	460.815
1.39203	444.946
1.43552	456.848
1.45293	466.003
1.42247	455.933
1.38332	433.96
1.42247	450.134
1.43552	468.75
1.40942	453.796
1.39203	444.031
1.43988	457.764
1.42683	458.984
1.43552	457.153
1.38767	449.524
1.43988	463.562
1.42247	456.543
1.40508	443.115
1.38767	446.472
1.44423	464.478
1.42247	460.815
1.42247	455.017
1.40942	447.083
1.44423	478.821
1.43118	459.9
1.40072	455.627
1.41813	452.881
1.43552	457.153
1.44857	464.783
1.42247	454.712
1.40508	442.505
1.45293	471.497
1.45293	466.919
1.40072	449.524
1.42683	459.9
1.45728	472.412
1.43552	452.881
1.39637	445.862
1.40508	451.66
1.47467	476.074
1.43118	455.017
1.39637	450.439
1.43118	460.51
1.44857	473.938
1.42247	460.51
1.38332	449.829
1.40508	453.796
1.45293	472.107
1.42247	455.933
1.40508	447.083
1.44857	462.036
1.45293	472.717
1.42247	464.783
1.42683	449.219
1.44423	463.562
1.46162	466.309
1.41378	451.355
1.41378	448.608
1.43118	453.491
1.45728	458.069
1.41813	451.965
1.40508	454.407
1.45293	470.276
1.43988	463.562
1.38332	440.674
1.40942	440.063
1.44857	464.783
1.44857	455.933
1.40942	449.829
1.40508	449.829
1.46162	474.243
1.43988	463.867
1.40942	447.693
1.39637	456.543
1.46598	461.426
1.44857	459.595
1.40072	444.946
1.40942	442.505
1.46598	465.698
1.43552	456.238
1.40942	450.134
1.43988	451.965
1.45728	469.055
1.43552	458.069
1.40942	445.251
1.40508	442.2
1.46598	463.257
1.44423	458.679
1.41813	449.524
1.41378	454.407
1.47903	477.295
1.41813	455.017
1.40508	458.679
1.39203	450.439
1.43552	466.309
1.41813	456.238
1.40072	447.388
1.40508	452.576
1.43988	460.51
1.40508	449.524
1.41813	453.186
1.43118	447.083
1.46162	466.309
1.43118	464.172
1.42247	451.05
1.43118	456.848
1.46598	470.276
1.42247	447.388
1.43118	453.796
1.40942	445.862
1.45293	455.627
19.2227	39.3677
2.31422	449.829
2.31858	449.829
2.31858	450.439
2.31858	477.6
2.31422	447.998
2.30552	454.712
2.30987	452.271
2.31422	469.971
2.30552	446.167
2.30552	449.219
2.30987	459.595
2.30987	466.003
2.30552	440.674
2.30552	456.543
2.31422	452.576
2.32293	472.717
2.32728	447.388
2.31858	444.946
2.32293	458.069
2.32293	476.379
2.32293	446.167
2.31858	448.303
2.32293	443.115
2.31858	459.9
2.32728	440.979
2.32728	445.557
2.32293	460.815
2.31858	469.666
2.31858	454.407
2.31858	456.848
2.31422	462.952
2.32293	473.938
2.31858	456.238
2.32293	446.167
2.31858	451.66
2.31422	467.224
2.30987	455.933
2.30987	436.707
2.31422	453.491
2.31422	464.783
2.31858	451.355
2.32293	440.369
2.32728	447.693
2.32728	467.224
2.32728	458.069
2.32293	439.758
2.32728	457.764
2.32293	478.516
2.32728	453.491
2.33162	452.271
2.32728	448.608
2.33597	469.055
2.33597	451.66
2.32728	436.096
2.32293	445.251
2.33162	470.276
2.32728	462.036
2.32728	451.965
2.31858	450.439
2.32728	466.309
2.31858	460.815
2.32293	452.271
2.31858	455.322
2.31858	469.055
2.31858	459.29
2.32728	452.881
2.31858	448.914
2.32293	462.646
2.32728	464.478
2.33162	449.524
2.32728	442.505
2.33162	464.172
2.33597	465.698
2.33597	443.42
2.33597	451.05
2.33597	456.848
2.33162	466.919
2.32293	453.491
2.32728	448.914
2.32728	463.257
2.32728	462.036
2.32728	456.543
2.32293	443.726
2.31858	457.764
2.31858	473.328
2.31858	457.458
2.31858	451.66
2.31422	463.257
2.31422	474.243
2.31858	455.933
2.31858	449.829
2.31858	462.952
2.32293	465.393
2.32728	456.848
2.32293	446.472
2.32293	472.717
2.32728	478.516
2.32293	452.881
2.33162	447.083
2.33597	448.608
2.33162	466.919
2.33162	456.238
2.32293	446.472
2.32728	451.965
2.32293	475.159
2.32293	445.251
2.32293	451.05
2.31858	456.543
2.32293	471.802
2.31858	456.238
2.31422	445.557
2.32293	452.271
2.31858	476.379
2.31422	459.29
2.31422	454.407
2.30987	460.205
2.31858	467.834
2.31422	459.595
2.30987	451.66
2.31858	457.458
2.32293	475.769
2.32293	456.543
2.32728	445.557
2.32293	455.627
2.32728	476.685
2.32728	464.478
2.33162	456.238
2.33597	443.115
2.33597	464.783
2.33597	451.355
2.33162	442.2
2.32728	449.829
2.32293	469.971
2.32728	459.9
2.32293	448.608
2.32728	442.505
2.32728	482.788
2.32728	463.867
2.32293	453.186
2.31422	462.341
2.31422	467.834
2.31422	457.764
2.32293	448.914
2.31858	446.777
2.32728	467.224
2.32728	452.881
2.32728	450.134
2.33162	445.557
2.33597	465.393
2.34032	454.407
2.34032	448.914
2.34032	438.843
2.34032	470.276
2.34032	465.698
2.33597	457.764
2.33162	448.608
2.33597	451.355
2.34032	468.14
2.33162	452.881
2.33162	449.524
2.33597	453.796
2.33162	460.205
2.33162	457.764
2.33162	448.303
2.33162	463.562
2.32293	462.036
2.32293	444.031
2.32728	444.946
2.32728	462.646
2.32728	470.886
2.33162	455.933
2.33162	446.777
2.33162	460.51
2.34032	469.666
2.34032	458.374
2.33162	445.251
2.34032	458.374
2.34032	470.276
2.34032	456.848
2.34032	443.42
2.33162	458.069
2.33162	465.698
2.33597	472.107
2.33597	453.491
2.33597	443.726
2.33597	472.107
2.33162	465.088
2.32728	444.641
2.31858	459.29
2.32728	469.971
2.32293	466.003
2.32293	448.303
2.32728	453.491
2.31858	466.309
2.31858	458.069
2.31422	450.439
2.32293	451.965
2.32728	458.374
2.33162	461.731
2.32728	453.796
2.33162	450.439
2.33597	466.309
2.33162	460.815
2.33597	449.219
2.33162	447.388
2.33597	465.393
2.33162	450.745
2.33597	452.271
2.32728	443.726
2.32293	471.191
2.32728	459.29
2.32293	444.946
2.32728	446.472
2.32728	469.055
2.31858	456.543
2.31422	448.303
2.31858	449.219
2.30987	467.529
2.31422	457.458
2.31422	456.848
2.31858	454.712
2.31422	470.886
2.31858	461.121
2.32728	458.374
2.33162	455.322
2.32728	469.666
2.32293	457.764
2.32728	451.66
2.33162	446.777
2.33597	459.595
2.33162	448.914
2.33597	448.914
2.32728	451.965
2.33162	461.121
2.33162	462.646
2.32728	450.439
2.32293	458.069
2.32293	469.666
2.32728	459.29
2.32293	449.829
2.32293	459.29
2.32293	470.581
2.31858	463.867
2.31422	445.557
2.32293	450.745
2.31858	463.257
2.31422	455.627
2.31422	451.05
2.31858	458.069
2.32293	475.464
2.33597	457.764
2.33597	444.031
2.33162	454.712
2.33162	466.003
2.33597	458.984
2.33162	458.374
2.33162	464.478
2.33597	473.022
2.32728	462.646
2.31858	450.745
2.32728	465.698
2.32293	477.905
2.33597	451.965
2.33597	446.167
2.33162	455.627
2.32728	473.633
2.31858	452.576
2.31422	451.965
2.32293	463.257
2.31858	470.581
2.31858	451.965
2.31858	459.595
2.31858	469.666
2.31858	467.224
2.31858	447.083
2.32293	451.965
2.32293	469.36
2.32728	469.055
2.33162	444.641
2.33162	452.271
2.33162	467.834
2.33162	467.224
2.31858	448.303
2.32728	456.848
2.31858	470.276
2.32293	457.764
2.31858	447.693
2.31858	444.641
2.32293	466.309
2.32293	462.036
2.32293	450.134
2.31858	451.355
2.30987	475.159
2.30987	458.069
2.30987	444.946
2.30552	443.726
2.30987	472.717
2.30118	456.543
2.30118	444.336
2.30987	458.069
2.30987	478.821
2.30987	455.017
2.30987	448.914
2.30987	451.66
2.32728	458.069
2.32293	442.2
2.31858	447.998
2.31858	457.764
2.31858	467.834
2.30987	446.167
2.31422	459.595
2.30552	458.069
2.31422	466.309
2.30987	455.933
2.30987	456.543
2.31422	461.121
2.31422	467.529
2.30118	440.674
2.30118	461.731
2.30552	464.478
2.29683	461.121
2.29248	443.726
2.29248	456.848
2.29248	474.854
2.29248	465.393
2.30118	449.829
2.30118	471.802
2.30987	464.478
2.30552	450.439
2.30987	450.745
2.31422	456.238
2.31422	480.957
2.30987	454.712
2.30987	445.862
2.30552	473.938
2.30552	466.309
2.30118	436.096
2.30987	448.914
2.30552	463.867
2.30552	468.14
2.30552	445.862
2.30552	451.66
2.30118	470.581
2.29248	468.14
2.29683	444.336
2.29248	454.407
2.30118	463.562
2.29248	462.036
2.29248	446.472
2.29683	470.581
2.29248	461.426
2.29683	449.829
2.29683	445.557
2.30552	469.666
2.30552	466.919
2.30118	455.627
2.30118	452.576
2.30987	476.074
2.30987	468.445
2.31422	453.491
2.30987	446.777
2.31422	469.666
2.30987	459.595
2.31422	445.557
2.30552	451.05
2.31422	476.074
2.31422	456.238
2.30987	450.745
2.30552	459.29
2.30552	467.834
2.29683	462.646
2.30118	439.758
2.29683	459.9
2.29683	469.055
2.29248	456.848
2.29248	451.05
2.29683	467.224
2.30118	465.698
2.30552	446.472
2.31422	443.726
2.31858	468.445
2.31422	463.257
2.31422	458.679
2.30552	459.595
2.31422	469.36
2.30987	452.271
2.31422	447.388
2.30552	441.589
2.30987	469.36
2.30118	451.05
2.30118	442.505
2.29683	454.712
2.30118	473.938
2.29683	448.608
2.30118	452.271
2.30118	456.848
2.29683	468.445
2.29248	458.679
2.28812	455.017
2.28812	469.055
2.28377	464.783
2.28812	450.745
2.29248	457.153
2.29683	463.867
2.30118	473.633
2.29683	441.284
2.30552	454.407
2.30118	476.99
2.30552	462.952
2.30118	441.589
2.30118	454.102
2.30118	472.107
2.30552	461.426
2.30118	442.505
2.29683	458.374
2.29248	477.295
2.29248	455.933
2.28812	459.9
2.29683	460.51
2.30118	461.121
2.30118	445.251
2.29248	449.524
2.29248	466.003
2.28377	466.003
2.28812	439.453
2.28377	456.848
2.28812	462.341
2.28812	468.445
2.29248	444.946
2.29248	459.9
2.29683	470.276
2.30552	454.407
2.30118	450.134
2.30118	461.121
2.30552	469.971
2.30552	463.867
2.30118	440.674
2.30552	467.529
2.30552	479.126
2.30552	454.407
2.30118	446.472
2.29683	467.529
2.29683	465.393
2.29683	454.407
2.29683	456.238
2.29683	470.276
2.29683	468.75
2.29683	447.388
2.28812	462.036
2.28812	473.022
2.28812	467.529
2.29248	437.622
2.29248	450.134
2.29683	462.952
2.29248	465.393
2.29683	448.914
2.30118	465.698
2.30552	462.952
2.30552	449.524
2.31422	440.063
2.30987	458.984
2.31422	461.426
2.31422	457.458
2.30552	451.355
2.30118	467.834
2.30118	462.646
2.30118	438.232
2.30552	447.083
2.30552	473.022
2.30552	448.914
2.30552	450.134
2.30987	454.102
2.30552	470.276
2.29248	461.731
2.28812	449.524
2.29248	460.51
2.29248	474.854
2.29248	473.938
2.29683	455.933
2.29683	451.05
2.30118	472.717
2.29248	455.322
2.29683	459.29
2.29683	466.919
2.30987	467.834
2.30987	446.777
2.30118	455.322
2.30987	474.854
2.30118	472.717
2.29683	455.017
2.30118	446.777
2.28812	469.36
2.30118	458.984
2.29683	451.965
2.29683	454.102
2.29683	464.783
2.29683	449.524
2.28812	450.134
2.28812	457.458
2.28812	473.938
2.28812	456.543
2.27508	452.881
2.27942	469.36
2.28377	467.529
2.27942	440.674
2.28377	455.627
2.28812	471.191
2.28812	464.478
2.29248	445.862
2.29248	457.458
2.28812	479.431
2.28812	460.205
2.29248	451.355
2.28812	467.224
2.29248	463.562
2.28812	446.167
2.28812	452.881
2.28812	468.445
2.28377	461.121
2.28812	443.42
2.28812	458.679
2.28812	461.121
2.27942	459.29
2.28377	451.965
2.27508	465.393
2.27073	459.595
2.27073	444.641
2.27508	452.271
2.27508	481.873
2.27942	466.614
2.27508	450.439
2.27942	462.952
2.28377	473.938
2.27508	451.66
2.27942	448.608
2.29248	473.633
2.29248	458.984
2.28812	452.271
2.28812	454.712
2.28377	465.088
2.28377	466.003
2.28377	450.745
2.28377	455.017
2.28812	473.022
2.27942	455.627
2.27508	453.491
2.27942	467.834
2.27508	469.971
2.27508	448.914
2.27942	456.543
2.27508	473.633
2.27942	460.205
2.27508	461.426
2.27073	466.003
2.27073	462.646
2.27508	446.472
2.27942	462.646
2.27508	463.257
2.28377	469.055
2.28377	451.05
2.28377	458.069
2.28812	469.666
2.28812	459.29
2.28812	461.121
2.29248	467.834
2.29248	468.445
2.29248	452.271
2.29248	450.134
2.28812	472.412
2.28377	476.685
2.28377	444.641
2.28377	458.984
2.29248	461.426
2.29248	458.374
2.28812	444.946
2.28377	473.022
2.28377	466.919
2.27942	447.388
2.28377	456.848
2.27942	475.159
2.28812	466.614
2.27942	457.153
2.27942	451.66
2.28812	467.529
2.29683	462.646
2.29683	449.219
2.30118	462.646
2.29248	469.971
2.28812	459.595
2.29683	443.42
2.29683	469.971
2.29248	463.867
2.30118	456.848
2.29248	454.712
2.30118	477.6
2.29683	456.543
2.28812	449.829
2.28812	452.576
2.29248	475.464
2.28377	462.646
2.28377	448.914
2.28377	473.633
2.29248	469.055
2.27942	452.881
2.27942	464.478
2.27508	471.802
2.27508	471.191
2.27508	438.538
2.28377	455.017
2.28812	479.431
2.29683	442.2
2.29683	448.914
2.29248	461.731
2.29683	468.445
2.29683	447.083
2.29248	450.134
2.29248	467.224
2.29683	470.581
2.29683	451.05
2.29248	460.205
2.29248	465.698
2.29248	460.51
2.28812	450.745
2.28812	460.815
2.28812	472.107
2.28812	459.9
2.28812	460.205
2.28812	472.717
2.28377	457.458
2.28377	455.322
2.27942	458.374
2.27942	464.783
2.27942	473.938
2.28812	445.251
2.29248	461.731
2.29683	469.666
2.30118	464.172
2.30118	439.758
2.29683	459.9
2.29683	476.99
2.29683	455.627
2.29248	449.524
2.30118	471.191
2.29683	458.984
2.29683	449.524
2.29683	452.271
2.28812	476.99
2.29248	473.938
2.29248	446.777
2.29248	454.712
2.29683	478.821
2.29248	466.309
2.29248	458.679
2.29248	465.393
2.28377	477.6
2.28377	455.017
2.28377	448.914
2.28812	475.159
2.29248	456.848
2.29683	447.083
2.29683	453.186
2.30118	469.666
2.29683	455.933
2.29683	441.589
2.30118	458.374
2.30552	473.633
2.30552	447.388
2.30552	443.726
2.30552	456.543
2.30118	465.698
2.30552	451.66
2.30552	449.829
2.30118	473.633
2.30552	478.516
2.30118	445.251
2.29248	456.238
2.29683	470.886
2.29683	469.666
2.29683	454.712
2.29683	463.257
2.29248	478.516
2.29248	451.355
2.29248	446.777
2.29683	466.309
2.29683	467.224
2.29683	453.186
2.30552	453.491
2.30552	468.445
2.30552	468.445
2.31422	445.862
2.30987	440.979
2.30987	463.562
2.30987	464.783
2.30987	447.998
2.30552	458.679
2.30987	470.581
2.30987	456.543
2.30552	440.063
2.30552	458.984
2.30552	462.036
2.30118	467.834
2.30118	451.66
2.30118	470.581
2.30118	459.595
2.29683	446.167
2.29683	456.848
2.30118	474.854
2.29683	471.191
2.29683	456.543
2.30118	461.731
2.29683	466.614
2.29683	466.003
2.30987	448.914
2.30552	458.984
2.31858	474.548
2.31422	459.29
2.30987	447.388
2.30987	469.666
2.30552	463.562
2.30552	456.238
2.31422	439.453
2.30987	471.497
2.31422	465.088
2.30552	461.121
2.30552	450.439
2.30552	479.126
2.30552	465.088
2.30118	445.862
2.30552	444.336
2.29683	466.003
2.30987	476.685
2.31422	456.848
2.31858	447.388
2.31858	458.679
2.30987	471.802
2.30987	455.322
2.30552	440.979
2.31422	463.867
2.30987	462.646
2.31422	445.557
2.31858	451.355
2.31422	476.99
2.31422	472.107
2.30552	449.219
2.30552	441.895
2.30552	463.257
2.29683	454.712
2.30118	447.083
2.30552	452.271
2.30118	481.873
2.30118	451.66
2.30118	448.303
2.30118	451.05
2.30118	476.99
2.30118	455.322
2.30118	452.881
2.30987	455.627
2.31422	469.666
2.31858	445.251
2.30987	451.965
2.31422	460.815
2.30987	476.074
2.30987	440.063
2.31422	450.134
2.31858	470.581
2.31858	467.224
2.30987	444.031
2.30987	465.393
2.30987	464.172
2.30552	461.731
2.30552	441.589
2.30987	461.731
2.30552	471.191
2.29683	463.867
2.30118	444.641
2.30118	460.51
2.30552	464.478
2.29683	466.614
2.29683	451.355
2.30118	468.14
2.29683	475.159
2.29683	455.627
2.30118	449.829
2.29683	456.238
2.30987	464.783
2.31858	455.627
2.31858	463.257
2.31422	465.698
2.31422	464.172
2.30118	443.42
2.30552	456.238
2.30118	454.712
2.30118	459.9
2.29248	443.115
2.29683	467.224
2.29248	461.731
2.29683	451.66
2.29683	451.66
2.30118	466.614
2.28812	462.952
2.28812	454.712
2.28812	462.952
2.28377	472.107
2.28377	461.731
2.28812	453.186
2.28812	474.548
2.28812	467.224
2.29248	452.881
2.29248	448.608
2.29683	481.262
2.29248	460.51
2.29683	452.576
2.30552	448.303
2.30987	476.685
2.30987	451.965
2.29683	453.186
2.29248	459.29
2.28812	471.802
2.28377	456.238
2.28377	458.984
2.29248	475.464
2.29248	457.764
2.30118	441.284
2.29683	450.134
2.29248	469.971
2.28377	461.426
2.27508	457.153
2.27508	458.984
2.27508	473.328
2.28377	448.914
2.28812	454.407
2.29248	473.022
2.29248	467.224
2.29248	462.646
2.29248	463.257
2.30552	471.191
2.30552	467.529
2.29683	446.167
2.30552	465.393
2.30118	469.666
2.29683	462.952
2.29248	451.355
2.29248	474.548
2.29683	468.14
2.29248	438.843
2.29683	449.829
2.29683	470.886
2.29683	466.614
2.28377	450.439
2.29248	468.445
2.28812	465.393
2.28812	456.543
2.28377	455.017
2.28377	475.769
2.28377	470.886
2.29248	459.29
2.28812	465.088
2.30118	463.562
2.29683	458.374
2.30552	462.646
2.30552	470.886
2.29683	469.055
2.30118	452.881
2.30118	444.946
2.29683	468.445
2.30118	457.153
2.30118	458.374
2.30118	453.796
2.30118	466.309
2.29683	457.153
2.29683	458.374
2.29683	460.815
2.29683	476.685
2.30118	454.102
2.30118	456.238
2.29683	468.445
2.29683	478.821
2.29248	439.453
2.29248	460.51
2.28812	478.21
2.28812	455.322
2.28812	459.595
2.29248	464.172
2.30118	468.445
2.30552	448.914
2.30118	454.407
2.30118	459.9
2.30552	470.276
2.30987	449.524
2.30118	461.121
2.30552	470.581
2.30552	458.069
2.30552	452.881
2.30552	463.257
2.30552	472.107
2.30118	454.407
2.29683	456.848
2.30118	473.633
2.30118	469.055
2.29248	449.829
2.29683	456.238
2.29683	476.074
2.30118	459.9
2.28812	446.472
2.28812	465.088
2.28377	465.698
2.28812	455.627
2.29248	449.524
2.30118	476.074
2.30118	464.783
2.30552	443.115
2.30987	455.017
2.30552	477.6
2.30552	454.102
2.30987	454.102
2.30987	455.017
2.31422	472.107
2.30987	453.186
2.30552	456.238
2.30118	481.567
2.30118	470.581
2.30118	452.271
2.30987	454.712
2.30552	461.731
2.30552	465.698
2.30118	455.322
2.30118	457.153
2.29683	472.717
2.29683	445.862
2.29683	454.712
2.29683	470.581
2.30118	472.107
2.30118	449.524
2.29683	458.374
2.30118	461.121
2.30118	462.952
2.30552	458.984
2.31422	457.153
2.31422	465.088
2.31858	462.036
2.31858	463.562
2.31422	464.478
2.30987	469.971
2.30552	456.238
2.30552	447.388
2.30987	469.666
2.31422	473.633
2.30987	445.862
2.31422	451.355
2.31858	460.815
2.30552	463.562
2.30118	450.439
2.30118	461.731
2.30987	476.074
2.30552	469.055
2.30118	447.083
2.30118	471.191
2.30552	469.36
2.30552	457.153
2.30552	458.374
2.30987	470.581
2.31422	460.205
2.31858	454.712
2.31858	451.66
2.32728	477.905
2.32293	461.426
2.32293	460.815
2.31858	444.641
2.30987	478.21
2.31858	472.107
2.32293	456.238
2.32293	446.472
2.32293	474.243
2.31858	463.562
2.31858	455.322
2.31858	462.646
2.31422	481.873
2.31422	460.51
2.31422	445.557
2.30987	456.848
2.30552	462.952
2.31422	450.745
2.30987	454.102
2.31422	456.848
2.31858	465.698
2.31858	451.355
2.31858	447.998
2.33597	473.022
2.33162	457.764
2.33162	442.2
2.33162	443.42
2.33162	466.309
2.32728	460.815
2.33162	451.965
2.33162	440.369
2.33162	470.581
2.32293	457.764
2.31422	449.829
2.32293	454.712
2.31858	469.971
2.32293	458.984
2.31858	447.388
2.32293	444.946
2.32728	472.717
2.31422	462.036
2.30987	457.458
2.31422	451.05
2.31422	458.679
2.31858	463.562
2.31858	453.186
2.32293	451.66
2.33162	470.581
2.32728	458.984
2.32728	451.355
2.33162	458.374
2.32728	469.971
2.33597	466.003
2.33162	447.693
2.33162	453.796
2.33597	469.36
2.32728	455.627
2.32728	448.608
2.33162	460.51
2.32728	463.867
2.32728	457.153
2.31858	455.017
2.33162	460.815
2.33597	475.159
2.33162	448.303
2.31858	441.895
2.31858	465.698
2.31422	467.224
2.31858	445.251
2.31858	447.388
2.31858	459.595
2.32728	469.36
2.32293	444.031
2.32728	456.238
2.32728	469.971
2.32728	464.783
2.33162	448.914
2.33597	440.369
2.33597	466.003
2.33162	461.121
2.32728	445.557
2.32293	448.303
2.32728	466.919
2.33162	466.309
2.33162	454.712
2.33597	447.388
2.33162	457.764
2.33597	470.886
2.32728	446.472
2.32728	447.083
2.32293	468.14
2.31858	472.717
2.31858	448.608
2.31858	448.608
2.32728	469.971
2.32728	475.769
2.32728	450.745
2.32293	447.693
2.32293	471.802
2.32728	464.172
2.33162	451.66
2.33162	450.745
2.34032	469.055
2.34032	474.854
2.33597	441.589
2.33597	448.914
2.33162	474.243
2.33597	462.036
2.33162	444.641
2.33597	445.862
2.34468	481.567
2.34468	466.614
2.33162	450.134
2.33162	449.219
2.33162	467.224
2.33162	462.341
2.33162	449.219
2.33162	455.322
2.32728	468.445
2.32728	470.581
2.32728	447.388
2.31858	453.491
2.31858	472.717
2.32728	465.698
2.32728	449.829
2.33162	461.121
2.33597	458.679
2.34032	456.543
2.34032	453.491
2.33162	457.458
2.32728	465.698
2.33162	464.478
2.33597	450.745
2.33162	452.576
2.33597	466.003
2.33162	462.341
2.32728	447.693
2.32293	459.9
2.32293	471.191
2.31858	458.984
2.31858	455.322
2.32728	455.017
2.32293	466.309
2.32293	454.407
2.30987	448.914
2.31422	461.426
2.31422	476.379
2.30987	445.251
2.30987	455.322
2.31858	467.529
2.32293	466.003
2.32728	443.726
2.32293	450.134
2.31858	452.271
2.31858	455.017
2.33597	438.843
2.33162	458.984
2.32293	475.159
2.32728	467.224
2.32293	437.012
2.32728	448.914
2.32728	458.679
2.32728	465.088
2.32293	443.115
2.32293	466.919
2.32728	468.14
2.32293	459.9
2.31858	448.608
2.31858	459.9
2.30987	467.529
2.30987	452.576
2.30552	447.693
2.31422	468.75
2.31422	472.412
2.31422	455.933
2.30987	449.524
2.31422	471.191
[truncated: 301 more rows]

## Sheet: Polydisperse
PMT1_width	PMT1_amp
2.17503	471.802
2.17503	492.859
2.17937	483.704
2.17937	471.802
2.17937	466.919
2.18807	477.905
2.18807	496.521
2.19243	473.633
2.18807	480.957
2.19243	456.543
2.18807	481.262
2.18807	496.521
2.19243	489.197
2.18807	475.769
2.19243	466.614
2.18807	477.295
2.18807	483.398
2.18807	486.145
2.18807	464.172
2.18807	470.276
2.18372	478.821
2.18807	483.093
2.18372	494.69
2.18372	472.107
2.18372	478.516
2.17937	472.412
2.17937	493.774
2.17503	487.671
2.17937	474.548
2.17937	471.802
2.18372	482.788
2.18807	492.249
2.18372	479.126
2.19243	473.938
2.18807	465.088
2.19243	479.736
2.20113	487.366
2.19243	487.976
2.19678	471.802
2.19678	466.309
2.19243	480.042
2.19243	478.516
2.19678	485.84
2.19678	469.971
2.18807	480.042
2.19678	482.483
2.19243	491.638
2.19678	491.333
2.19243	462.341
2.19243	474.548
2.19243	473.328
2.19243	495.605
2.18807	484.314
2.18807	467.834
2.18372	475.769
2.18807	488.281
2.18372	493.164
2.19243	479.431
2.18807	463.867
2.19243	454.407
2.19678	473.022
2.20113	484.009
2.19678	484.619
2.19678	469.971
2.19678	468.445
2.19678	487.976
2.19678	487.976
2.20113	494.385
2.19678	468.445
2.19243	465.088
2.19678	485.84
2.19678	489.197
2.19243	483.398
2.18807	472.412
2.19243	479.126
2.18807	473.633
2.18807	489.502
2.18807	486.755
2.18807	467.529
2.18807	473.633
2.18372	486.45
2.18372	494.08
2.17937	474.243
2.17937	473.328
2.18372	472.717
2.18807	496.521
2.18807	484.619
2.19243	465.698
2.19243	466.919
2.19243	478.21
2.19678	495.605
2.19678	481.873
2.20113	474.854
2.18807	456.238
2.19678	479.431
2.19678	493.164
2.19243	491.638
2.19243	479.126
2.19678	471.191
2.19243	478.821
2.19243	486.45
2.18807	479.431
2.18807	467.529
2.18807	467.834
2.18372	479.126
2.18807	485.535
2.17937	486.145
2.18372	474.243
2.18372	480.347
2.18372	473.328
2.18807	492.859
2.18807	478.516
2.18807	473.633
2.18807	461.426
2.20113	487.671
2.19243	497.742
2.19678	482.788
2.20113	472.107
2.19678	470.581
2.20113	487.976
2.19678	484.009
2.20113	479.126
2.19678	470.276
2.19243	465.393
2.19678	488.281
2.19678	496.216
2.19678	475.464
2.19243	466.614
2.19243	489.807
2.18807	482.788
2.19678	491.333
2.18807	480.652
2.18807	453.186
2.18372	470.581
2.18807	487.366
2.18807	493.469
2.18807	473.633
2.18807	469.055
2.19243	467.224
2.19678	487.366
2.20113	482.178
2.19678	480.957
2.20547	473.938
2.19678	474.243
2.20547	494.08
2.20982	485.84
2.20547	481.262
2.20113	465.393
2.20982	474.854
2.20982	489.197
2.20113	490.112
2.20113	465.088
2.20547	461.731
2.20113	483.093
2.20547	493.469
2.20113	489.502
2.20547	469.36
2.20113	474.854
2.20113	476.685
2.20113	484.314
2.19678	493.469
2.20113	467.529
2.19678	470.276
2.20113	469.666
2.20113	492.249
2.20113	485.84
2.20113	471.497
2.20982	465.393
2.21418	466.919
2.20982	499.268
2.21418	481.262
2.20982	473.022
2.20547	466.003
2.20982	478.21
2.21418	495.605
2.21418	488.586
2.21418	473.938
2.20982	463.562
2.20982	474.548
2.20547	487.976
2.20982	488.586
2.20547	469.666
2.20547	472.107
2.20547	476.074
2.20113	490.723
2.20547	484.009
2.20113	464.478
2.19678	471.497
2.20113	476.379
2.20113	488.892
2.19678	489.197
2.20113	474.548
2.20547	481.567
2.20547	469.971
2.21418	498.352
2.20982	481.262
2.21418	472.107
2.21853	468.75
2.21418	483.398
2.21853	489.502
2.21853	477.905
2.21853	482.788
2.21418	461.121
2.21418	479.431
2.20982	485.229
2.21418	488.586
2.21853	479.126
2.21418	478.21
2.20982	481.567
2.20982	482.178
2.21418	489.197
2.20547	475.159
2.20982	464.172
2.20547	473.938
2.20547	491.943
2.20547	496.521
2.20113	471.497
2.20547	469.36
2.20547	467.224
2.21418	483.704
2.21853	492.249
2.21418	482.483
2.21853	469.36
2.21853	463.257
2.21853	486.45
2.22288	488.281
2.21853	484.314
2.22288	460.205
2.22288	472.717
2.22722	478.516
2.21853	495.3
2.21853	484.619
2.21853	462.952
2.21853	474.854
2.22288	475.159
2.22288	489.807
2.22722	488.281
2.21853	469.666
2.21853	469.971
2.21853	468.445
2.21853	492.859
2.21418	477.905
2.21853	467.224
2.20982	470.886
2.21853	479.736
2.22288	492.554
2.22288	490.417
2.22288	471.802
2.22288	465.088
2.22722	470.276
2.23157	482.788
2.23592	480.957
2.23157	476.685
2.23157	459.9
2.23157	469.055
2.23157	479.431
2.23592	487.976
2.23592	485.535
2.23157	464.172
2.23592	467.834
2.23157	480.042
2.23157	490.723
2.23157	474.854
2.22722	466.309
2.23157	464.172
2.22722	470.886
2.23157	491.333
2.23157	484.619
2.22722	480.957
2.22288	460.205
2.22722	467.224
2.22288	480.957
2.22722	487.976
2.22722	478.516
2.23157	468.14
2.22722	474.548
2.23592	469.055
2.23592	484.924
2.24028	480.652
2.24028	475.159
2.23592	468.445
2.23592	474.548
2.24028	482.788
2.23592	480.042
2.23592	480.042
2.23592	473.938
2.23157	477.905
2.23157	484.314
2.23592	482.483
2.22722	474.243
2.22722	461.731
2.22722	471.802
2.23157	482.178
2.22722	481.262
2.22288	484.314
2.22288	455.322
2.22288	466.003
2.22722	469.971
2.21853	487.366
2.22722	477.905
2.22288	466.309
2.22722	475.159
2.23157	475.769
2.23157	491.638
2.23592	486.145
2.23592	477.6
2.23157	457.764
2.24463	465.088
2.23157	490.417
2.23592	478.516
2.23157	480.957
2.23157	456.848
2.23592	469.971
2.23592	483.398
2.23592	484.314
2.23157	485.229
2.22722	462.341
2.23157	478.821
2.23592	476.685
2.22722	492.249
2.23157	491.028
2.22288	469.666
2.22722	466.003
2.21853	464.478
2.22722	486.755
2.22288	478.516
2.22288	476.99
2.22722	466.919
2.22722	480.347
2.23592	488.281
2.22722	474.548
2.23592	479.126
2.23157	463.257
2.23592	474.854
2.23592	487.976
2.23592	486.145
2.23592	473.328
2.23157	464.172
2.23592	471.497
2.23592	473.022
2.23157	477.6
2.23157	487.671
2.24028	465.088
2.23592	467.529
2.23157	470.886
2.23157	490.417
2.23157	478.21
2.22288	468.14
2.22722	463.867
2.23157	455.933
2.22722	487.976
2.22288	486.145
2.21853	482.788
2.22288	465.393
2.22722	472.717
2.22722	479.431
2.22722	481.873
2.24028	475.159
2.23592	457.764
2.23592	464.783
2.23592	479.736
2.24028	490.112
2.24028	491.943
2.23592	474.854
2.24028	466.919
2.24028	462.646
2.23592	484.009
2.24028	484.009
2.23592	476.074
2.23157	467.834
2.23157	474.854
2.23592	477.6
2.23592	487.366
2.23157	477.295
2.23157	469.666
2.23157	469.36
2.22722	469.055
2.22722	479.736
2.22722	484.009
2.22288	464.478
2.22288	463.867
2.22722	477.6
2.22722	492.249
2.23157	487.671
2.22722	464.172
2.23592	462.952
2.23592	468.14
2.23592	484.924
2.23157	490.112
2.24028	474.548
2.23157	462.036
2.23157	461.121
2.23157	488.892
2.23157	494.08
2.23157	481.873
2.22722	465.088
2.22722	464.478
2.22722	483.093
2.22722	487.061
2.22722	491.638
2.22722	458.069
2.22288	469.36
2.22288	469.666
2.22288	494.385
2.21853	486.45
2.21853	467.529
2.21853	476.99
2.21853	474.548
2.21853	490.723
2.21853	486.45
2.21853	466.309
2.22288	463.867
2.22288	473.633
2.22288	492.554
2.22722	478.821
2.22288	473.022
2.22722	466.309
2.22722	473.022
2.23157	487.366
2.22722	488.281
2.22722	478.821
2.22722	460.51
2.22288	472.717
2.22288	467.224
2.22288	483.093
2.22288	484.009
2.21418	469.666
2.21853	476.685
2.21853	483.398
2.21853	494.69
2.21418	471.802
2.20547	463.257
2.20982	470.276
2.21853	486.145
2.14893	496.521
2.11848	475.769
2.12283	471.802
2.13152	491.333
2.17068	480.652
2.14458	475.769
2.13152	478.516
2.14023	491.333
2.16633	491.333
2.03147	478.516
2.13587	500.793
2.07063	458.069
2.11848	480.347
2.12283	487.976
2.12283	486.755
2.07497	466.919
2.09673	496.826
2.07497	493.774
2.11848	469.971
2.12717	477.295
2.18807	487.671
2.14023	478.821
2.15762	473.633
2.07932	492.859
2.08367	473.633
2.05322	479.736
2.06193	484.924
2.11413	467.529
2.13587	496.826
2.03147	493.774
2.07932	474.854
2.29248	473.938
2.12283	490.112
2.04018	479.431
2.20982	497.742
2.10542	482.483
2.02712	473.633
2.08803	498.657
2.03582	473.633
2.14458	483.704
2.02712	473.022
2.05757	476.99
2.23592	472.412
2.17503	494.385
2.02712	474.548
2.15327	494.08
2.07063	481.262
2.09238	477.6
2.05757	489.197
1.99667	465.393
2.55348	476.685
2.31422	484.619
2.04018	491.638
2.11848	465.698
2.04887	488.586
1.96188	475.159
1.95752	465.698
2.10977	490.723
2.18807	495.605
2.02712	465.088
1.96188	480.347
2.08367	476.379
2.04018	495.605
3.15377	325.928
2.08803	496.216
2.02712	469.055
1.95752	467.529
2.00537	475.769
2.14023	491.943
2.30552	471.191
1.99232	477.6
2.06628	477.905
2.07932	489.197
2.00972	473.328
2.55348	418.701
2.19243	483.704
1.93142	465.698
2.04453	479.736
1.85312	475.464
2.66222	388.794
2.20113	488.586
1.91837	474.548
1.94447	489.197
2.20113	489.807
3.76713	350.647
2.21853	486.45
1.90098	469.055
1.94013	478.821
2.07932	471.191
3.73667	356.75
1.85312	480.042
2.92322	380.554
2.04453	483.704
1.92273	473.633
3.74973	340.576
2.50563	484.924
2.38817	472.412
2.00102	479.431
2.05757	481.567
2.15327	472.717
2.05322	482.788
2.37078	462.646
2.10977	479.736
3.93677	346.069
2.35772	460.51
1.85747	456.848
2.28812	465.088
3.41043	348.816
3.25382	338.44
3.55832	337.83
4.44573	354.309
1.67477	435.486
4.14992	347.595
2.40123	465.393
2.68832	464.478
1.90098	481.567
1.93142	472.107
5.14173	432.129
2.11848	505.676
2.61002	475.159
1.95752	478.821
2.30552	489.197
2.67092	355.835
2.70573	401.306
2.47083	476.379
3.22337	364.075
3.37997	334.778
4.11512	350.952
2.61002	435.791
1.79658	468.445
1.53123	409.851
2.09673	470.886
1.90532	484.619
2.81447	388.489
2.18807	497.131
4.60233	355.225
3.57572	328.064
3.02763	284.729
2.94932	391.541
3.88022	365.601
2.64047	401.611
4.23693	333.557
3.24512	347.29
1.94883	469.666
4.85898	332.947
4.61102	345.459
2.46647	410.461
3.29732	358.276
3.91067	330.2
2.16633	486.145
2.08367	470.276
4.38917	341.187
3.43217	341.492
2.91887	368.958
3.04502	422.668
2.36207	357.971
6.32493	417.786
2.27508	458.069
2.89277	350.342
2.09238	496.216
3.78017	335.083
2.82753	340.881
4.02377	342.102
2.10977	440.063
2.47083	343.628
7.89527	376.892
3.59313	349.731
5.50713	407.41
2.54478	405.884
1.76612	471.802
3.18423	328.979
7.17317	400.391
2.45343	356.14
2.24463	462.646
1.56167	422.363
3.44523	349.426
1.60953	446.167
3.68447	325.317
3.78452	333.862
2.07063	445.251
7.37327	364.075
1.86183	484.924
3.04937	344.543
1.80527	449.829
4.04552	332.031
1.94447	484.009
1.30937	353.394
3.16682	341.797
6.21183	429.077
3.54962	327.759
2.21418	451.355
2.06628	480.957
3.56703	340.881
2.80578	362.549
2.42733	365.906
5.29397	328.674
10.2138	418.091
2.63178	350.952
3.00588	340.576
3.65402	344.543
2.24463	488.281
2.84492	327.759
5.00253	336.304
2.71442	368.347
2.30987	401.917
4.89813	356.445
3.39303	343.323
3.19292	341.187
5.09823	376.892
2.70138	374.451
3.83237	337.83
3.27992	326.538
2.09673	437.012
5.41143	435.181
3.92808	341.187
3.11463	332.947
2.92322	410.767
2.23157	487.061
1.75307	454.407
3.24078	333.557
2.98413	390.015
8.66522	393.677
3.15377	328.064
2.81882	343.323
3.51048	335.999
2.41863	494.385
2.53607	479.126
4.26302	324.097
2.36643	441.589
3.38868	398.254
2.19243	397.644
4.46748	328.674
2.40992	445.862
2.24898	452.576
2.59698	372.925
4.55013	325.012
3.32342	346.985
2.09238	480.652
2.20113	478.516
2.06628	470.886
1.90532	485.229
2.24463	453.491
2.60568	401.611
1.98362	474.243
5.58108	388.184
2.51432	399.78
3.30602	341.187
2.21853	433.96
3.18858	351.868
2.35338	497.742
2.07063	478.21
4.58927	340.576
2.70573	406.189
2.21853	468.75
2.50128	375.061
4.00638	328.979
1.80093	463.867
3.02763	350.647
2.05757	473.938
2.54042	394.287
3.80193	337.524
3.24947	343.018
2.44473	431.213
2.28377	384.216
4.12383	341.492
3.68012	353.088
1.38332	329.59
2.75358	343.628
2.94062	477.6
1.96188	454.407
3.76277	332.642
3.37997	330.505
2.97542	349.121
9.00018	399.475
1.93578	475.769
3.15813	346.985
1.60082	482.178
7.06877	407.104
1.74873	471.497
3.44523	344.849
1.95318	491.638
3.34083	347.29
3.76713	338.135
5.74202	452.576
2.90583	341.797
9.50912	372.62
1.53123	437.927
2.98848	339.355
2.28377	473.633
2.38382	362.549
2.89712	341.187
2.59262	370.178
3.15377	317.993
2.01408	489.502
3.78017	351.868
4.11512	320.74
3.24512	321.655
3.44523	343.018
7.02093	415.039
1.83573	490.723
2.21418	471.497
2.57523	366.821
1.74873	470.276
4.67628	342.712
3.38433	338.135
2.49257	462.341
2.66222	387.878
2.59262	478.821
2.20113	456.543
2.94497	341.187
3.35387	343.323
2.47953	429.688
9.35688	387.878
2.61872	363.77
2.44037	392.151
3.09722	369.873
3.14507	336.304
2.64918	402.222
4.56752	354.919
2.67963	376.282
9.47868	374.146
1.68348	465.088
2.77533	333.252
1.83137	473.938
2.88408	363.159
4.40222	338.44
4.50662	332.031
3.11463	353.394
2.55782	393.372
5.48538	404.053
3.49742	338.745
2.70138	369.873
2.71442	442.2
2.89277	357.056
2.60133	389.709
3.31473	354.614
2.82317	350.342
2.16633	383.606
4.31088	342.102
4.50228	322.266
1.57038	439.758
2.48387	400.696
3.21033	351.257
3.87588	332.336
2.52303	439.758
3.93242	324.707
2.49257	453.186
1.98798	478.821
3.51918	342.712
1.90098	462.036
2.18372	490.417
2.25767	469.971
2.76227	386.353
2.08803	466.309
2.56217	456.238
2.74052	401.001
1.91403	462.341
2.56217	396.118
2.04018	487.366
2.20113	471.802
2.71877	460.205
2.51867	443.42
1.97927	477.295
2.36207	454.407
2.30552	465.698
1.99232	481.873
2.25332	465.393
2.36207	454.102
2.58827	379.028
1.75307	458.374
2.19243	469.055
2.61437	484.619
1.83573	466.919
1.97927	480.957
2.39253	474.548
2.34903	476.379
2.32728	468.445
2.27942	485.229
2.84492	429.382
2.29248	484.314
2.08367	484.009
2.27942	468.75
1.92708	483.398
2.19243	491.333
2.09238	475.769
2.24463	455.017
1.97057	484.009
2.20113	496.521
2.66222	390.015
2.42298	484.009
2.29248	469.666
2.30552	463.562
1.94013	466.919
2.13587	464.783
2.18372	480.957
2.04887	479.431
1.90098	477.295
2.06193	488.892
1.94883	481.873
1.96622	473.328
2.20547	468.75
2.17068	470.276
2.21418	482.483
2.03147	475.159
2.10977	477.6
2.33597	433.655
2.32293	479.431
2.34468	456.238
2.03147	472.107
2.36643	463.867
2.43167	439.758
2.13152	480.042
2.37513	474.243
2.32293	447.998
2.03582	489.197
2.03582	492.859
1.92708	484.619
2.16633	469.055
1.99232	473.022
2.07063	496.521
2.03582	479.126
2.01843	486.755
2.16633	493.164
2.84057	351.868
2.15762	475.159
2.15327	504.15
2.04887	467.834
2.22288	473.633
2.11413	498.047
1.98362	482.483
2.04453	480.347
2.10107	504.15
5.06778	389.709
2.45777	454.712
2.67963	429.688
2.00972	486.145
1.92708	486.145
2.11848	468.14
2.23157	459.9
2.05757	489.807
2.15762	505.371
2.22722	465.088
2.21853	474.243
2.28377	463.562
2.25332	481.262
2.38817	450.745
2.26202	476.074
2.01408	496.521
3.65837	337.524
2.24028	480.347
2.39688	473.022
2.16633	487.061
2.12283	506.897
2.31422	478.516
3.72797	332.642
2.41863	473.022
2.47953	483.093
2.21853	481.873
2.19678	498.962
2.19678	470.581
2.18372	495.911
3.21468	337.219
2.46212	462.646
2.33597	470.581
2.29248	466.003
1.94447	485.229
2.13152	487.976
2.54042	403.748
2.34468	466.003
1.95318	463.562
2.27508	492.859
1.94883	480.957
2.46647	462.036
2.55348	413.818
2.36207	470.581
2.22288	465.698
2.34032	494.385
2.08367	472.412
2.56652	429.688
3.76277	329.895
3.01892	393.677
3.71493	324.707
2.81882	436.096
2.47953	499.573
2.34468	450.745
1.96188	480.652
2.71442	359.497
2.80578	387.878
2.39688	457.458
2.98413	430.603
2.00972	496.826
2.19678	477.905
1.87922	475.769
2.48822	499.878
2.27508	486.45
2.55348	450.439
2.24463	476.379
1.99232	464.783
2.19243	448.303
2.81447	362.244
2.43167	451.66
2.78837	382.69
3.40172	347.9
2.04453	475.769
3.00152	361.938
2.18372	500.183
3.44088	339.05
3.03198	358.582
3.26688	337.219
4.81548	345.764
4.48923	391.846
2.58827	443.115
2.98413	342.407
3.74103	353.088
3.95418	344.238
2.23592	484.619
2.24463	467.224
2.54913	365.601
1.84442	467.529
3.07983	339.661
3.00588	354.919
2.56652	477.295
3.98462	347.29
2.60568	409.241
3.70622	357.971
2.85798	496.216
1.52252	371.094
2.10542	485.84
4.22823	354.309
2.18372	487.671
3.57572	355.835
3.07983	368.347
1.63563	455.322
5.32008	350.037
5.42882	356.14
2.60133	496.521
3.52352	345.764
3.68012	326.843
5.11562	362.549
2.34032	466.919
9.28727	384.521
3.07983	336.914
2.39688	368.042
2.50128	362.244
2.52303	428.162
5.63762	349.731
4.38917	313.416
2.15327	464.783
2.50997	441.284
1.63997	439.758
4.07163	339.966
4.18037	351.562
2.80578	429.993
4.65017	368.958
1.90098	457.153
2.87538	401.611
2.77097	394.897
2.86667	373.535
1.86183	459.595
3.03633	337.524
2.34903	461.731
3.17552	359.497
2.44908	484.314
3.73667	334.473
1.92273	487.061
2.84492	365.601
1.82268	466.919
3.43653	339.05
2.68832	461.731
1.72263	480.957
10.2138	507.812
5.19393	342.712
3.16682	508.728
1.78353	470.886
4.16298	354.614
4.86768	350.952
5.12868	405.884
3.75842	345.764
2.03582	488.586
2.79272	368.958
1.47033	385.437
3.48873	339.966
4.30652	350.037
2.00537	467.834
3.00588	369.873
2.14023	476.379
1.88357	479.736
2.97542	361.633
3.85412	325.928
1.90098	455.627
3.01892	343.628
2.87538	415.344
3.13203	350.342
3.33648	345.764
2.24898	461.426
2.13587	483.093
4.62843	376.587
3.02763	356.445
4.00202	326.233
2.62308	394.897
5.68112	369.568
10.2182	400.391
4.55013	325.317
2.60133	475.159
2.07932	460.815
3.07112	361.938
4.68497	331.116
3.58007	350.952
3.04502	349.426
2.67528	340.271
3.67577	335.083
4.25432	351.562
3.10157	353.699
3.21902	332.947
6.98613	427.551
5.05037	347.9
2.21853	502.93
6.67727	426.636
2.95803	390.015
2.29683	449.219
2.20547	473.938
3.16248	338.745
4.37178	340.576
3.27992	350.647
0.883075	118.713
6.91218	442.505
3.08418	346.68
2.93193	447.693
2.18372	505.371
4.57188	340.881
5.67242	340.271
9.79622	392.761
5.94648	435.181
2.54478	421.143
3.37127	342.407
3.46698	334.167
1.94013	461.731
3.67577	332.031
3.81062	332.031
7.40372	365.601
7.19057	372.314
2.18372	509.338
4.30218	341.492
2.84928	468.14
4.60233	354.614
1.85312	453.491
9.30903	365.295
3.66273	326.233
5.15043	358.276
4.44573	334.778
1.81397	469.666
3.78887	323.792
2.29248	507.202
5.80293	422.363
2.20113	486.755
3.08853	342.712
4.18473	339.966
3.23208	475.769
3.76713	343.323
2.94062	359.497
2.08803	479.736
2.27942	445.557
4.17603	332.336
5.51147	354.919
2.89277	451.355
2.79707	443.115
2.64047	376.282
2.13587	466.614
3.58878	357.971
3.10593	340.271
3.43653	325.928
3.44088	336.914
2.63612	455.017
4.52402	335.693
3.51048	353.088
3.10157	341.187
4.18473	343.018
2.28812	489.197
4.01072	350.342
3.81933	346.68
3.35387	342.712
2.01843	462.952
4.63277	344.238
4.52837	356.75
2.81447	433.96
3.65837	396.118
2.98848	389.404
3.98897	337.219
4.22823	346.069
6.37277	367.126
1.89663	443.115
2.90583	387.268
2.40992	418.091
1.98798	446.777
4.45008	328.369
3.33213	468.14
2.50563	410.767
5.47232	341.492
2.39688	390.015
3.45392	353.088
3.07983	343.628
2.76662	422.363
3.90632	340.881
2.64047	418.701
1.78353	456.848
4.41528	337.219
4.45008	357.971
2.28377	452.271
2.16633	449.524
3.50177	366.211
2.53172	328.674
3.21902	352.173
1.98798	487.061
2.61437	408.936
2.47953	344.543
4.08467	327.148
2.76662	405.579
2.15327	479.126
1.97057	494.08
2.67528	335.388
1.58777	431.519
3.01892	346.68
2.58392	371.094
1.91403	484.619
2.78837	415.955
2.83188	336.609
3.92373	357.666
1.78353	470.886
2.83188	480.957
4.74587	346.375
3.48873	344.238
2.19243	471.802
2.49693	400.696
3.10593	355.225
2.84492	503.235
4.00202	341.492
1.98798	467.834
2.58392	391.235
1.63563	459.29
5.01558	346.68
2.63612	385.742
2.16633	389.404
5.32008	358.582
2.02712	450.745
2.38817	404.358
2.47953	391.541
3.15813	329.59
2.87973	357.056
2.91018	338.745
2.21853	457.153
2.58827	500.488
3.97158	334.778
3.32777	337.83
1.74873	457.153
2.86232	348.206
1.80093	468.445
2.60568	390.625
2.73617	351.868
4.01943	335.388
2.43602	444.946
2.66222	452.576
3.41043	454.102
4.17603	319.214
1.60082	432.434
3.84543	340.271
1.97493	482.483
3.24947	357.056
3.55397	335.693
2.00102	468.445
2.54042	399.17
2.54913	463.562
1.95752	472.107
2.24898	460.51
2.83623	370.789
3.59313	328.369
6.41627	453.186
2.32728	491.333
2.99282	368.042
2.64918	436.707
2.64482	378.418
3.11897	348.816
2.51432	462.036
2.44473	432.129
3.01892	395.813
2.64047	444.641
2.14458	457.764
4.01072	332.642
2.05322	465.698
3.12767	338.44
3.78887	347.29
2.02712	476.685
3.74973	329.895
2.52738	483.398
2.50997	437.317
2.49693	461.731
5.38532	351.257
4.85027	348.816
1.51818	422.058
2.85798	343.323
1.96622	488.281
2.20982	462.952
3.02763	370.789
3.01023	340.576
2.28377	504.15
2.51867	360.413
2.89712	355.53
3.27557	348.816
2.53172	414.124
3.70622	339.355
2.32728	482.178
2.14023	457.458
4.31088	352.478
2.19243	477.6
3.77583	360.413
2.84057	344.849
1.99667	466.309
4.51532	351.562
2.30552	471.802
1.98362	454.102
4.24998	343.628
3.96723	334.778
2.67092	347.595
2.42733	487.671
4.00202	348.816
2.25332	462.341
4.11078	340.271
6.71207	401.611
3.16682	346.375
2.21853	495.605
2.72748	353.394
2.20547	502.014
3.43217	343.628
2.84057	372.314
3.74973	337.524
1.96188	482.178
7.70388	395.813
2.29683	490.112
2.52738	446.167
4.31088	357.971
4.11078	351.257
3.71928	342.712
3.51048	335.999
2.51867	411.987
1.93578	486.45
3.51048	335.999
3.07983	402.222
2.93628	388.489
3.07112	340.271
1.90532	461.426
2.91018	358.276
3.47567	342.712
2.39688	484.924
3.22772	347.29
3.02763	344.849
3.17117	379.028
4.13687	343.933
4.68933	361.328
3.30167	332.336
3.42782	413.513
3.27992	335.083
3.90632	349.731
3.57138	352.783
2.91018	367.432
6.12918	362.244
8.33028	437.622
4.26738	335.693
2.55782	368.958
2.48387	426.025
2.57523	413.818
2.40557	458.069
3.23643	349.121
2.22288	460.51
2.96672	359.802
3.13638	333.862
2.42298	453.796
3.02327	350.037
2.85363	353.088
1.91837	467.834
2.70138	390.93
2.94932	343.018
3.35823	338.44
2.71442	387.878
3.04502	340.271
2.06193	423.279
2.24463	450.745
3.74103	332.642
3.08853	378.113
3.59748	343.323
3.37562	334.473
2.67528	422.668
2.16633	441.284
4.14558	332.031
3.88022	343.933
1.88357	466.919
3.20162	348.206
4.28913	339.661
3.65402	343.323
2.99282	409.546
1.89227	472.717
4.45878	365.601
2.15327	480.957
2.43602	466.614
2.51867	471.191
1.97057	472.717
1.81832	479.126
2.47518	383.606
2.74487	343.323
2.39253	495.911
2.67963	413.513
2.40557	442.505
1.76178	456.238
2.71442	367.737
2.68832	375.366
1.86183	446.167
1.75743	454.102
2.58392	383.911
3.24512	348.511
2.56217	410.461
4.78503	359.497
3.04502	351.562
2.49693	392.151
3.00152	348.816
2.24463	496.826
3.25382	342.712
3.23208	370.178
5.13737	343.018
2.69267	379.944
2.85798	381.165
2.87102	393.066
2.03147	478.821
2.97542	396.118
4.11078	343.018
1.97927	476.685
2.57958	405.579
2.62743	391.235
3.17117	335.999
2.53607	468.445
2.93193	339.966
1.80527	458.984
2.02278	476.99
2.67963	386.658
2.40557	497.131
2.29683	469.055
1.86183	467.834
5.17218	383.911
2.48822	470.581
2.70138	364.99
2.78403	357.361
2.89712	358.582
3.06243	339.355
3.05373	369.873
4.94597	354.004
2.94062	342.712
2.26638	480.347
2.57523	420.532
2.83623	334.473
2.96238	373.23
5.05037	339.661
3.00152	340.576
2.49257	445.862
2.82317	377.502
1.84442	471.191
2.58827	357.361
3.58007	348.816
6.26837	460.51
3.13638	354.309
2.60133	423.584
3.24078	351.257
4.66322	380.859
2.15327	497.742
3.24947	345.154
3.27122	350.037
2.61872	416.565
3.58442	359.192
5.72027	469.055
2.01408	494.69
3.62792	338.745
2.42298	481.873
2.55348	375.671
6.95132	439.758
2.02278	470.581
3.39303	326.843
2.72313	427.551
3.03633	353.699
2.29683	422.363
2.70138	384.216
2.03147	466.309
2.13587	475.769
2.43167	485.535
2.33162	449.829
3.12332	342.102
3.21033	391.541
7.05138	433.96
1.67043	447.693
4.52402	356.75
2.61872	472.107
2.76662	372.62
1.97057	472.717
1.60082	437.012
3.24947	340.576
3.41478	348.511
2.58392	468.14
2.88408	484.009
4.58493	363.77
2.27073	481.873
2.69267	452.881
3.41913	334.167
2.51867	431.824
3.33648	355.835
2.00972	480.042
4.20212	348.206
1.47467	391.541
3.24512	343.323
2.26638	461.731
3.08853	362.549
3.48002	337.219
2.31422	483.398
2.94497	364.075
3.66273	350.342
2.18807	464.172
2.16633	472.717
3.59313	345.764
2.50563	488.586
1.97493	448.303
3.09722	365.906
2.73183	407.104
3.81062	347.595
4.31958	341.187
2.65353	378.113
2.51867	442.2
2.20113	479.126
2.95368	483.398
2.29248	410.156
2.89712	350.342
1.82702	432.129
2.82753	372.009
2.81013	364.99
2.14023	476.685
2.45777	474.548
2.20113	458.374
2.73183	393.982
2.62308	408.936
1.92708	487.366
3.02763	349.731
2.17937	489.502
2.12283	476.685
2.98413	338.135
3.84543	345.764
3.35823	362.854
2.63612	390.93
2.34903	453.186
2.53607	437.622
2.47953	418.091
2.40123	444.946
2.05322	486.755
2.13152	473.328
2.34032	454.712
2.71007	403.442
2.37947	467.529
1.83573	450.745
2.07063	491.638
2.31422	463.562
2.44037	444.946
2.04453	477.295
2.17937	495.605
2.17068	478.21
2.34032	487.061
1.87488	461.121
2.08367	476.379
2.15327	478.821
1.99232	467.529
2.40123	489.502
2.18372	485.535
2.16197	490.112
1.97927	490.723
2.58392	444.641
2.87973	364.38
2.07497	497.437
2.15327	485.229
2.08803	494.385
1.87488	475.159
2.08367	465.698
2.79272	372.925
2.45343	455.933
2.17503	496.216
2.28377	464.172
2.64482	409.241
2.44037	495.605
2.25332	476.379
2.68398	377.502
2.31858	473.633
2.12717	478.821
2.09673	503.54
2.26202	476.685
2.17937	490.417
2.07063	491.638
2.03582	498.962
1.95318	495.3
1.98362	475.464
2.15327	490.417
2.01843	487.671
2.09673	472.412
1.91403	465.088
2.09673	476.379
2.04887	494.08
2.19243	476.379
2.26202	484.314
2.26202	473.633
2.01408	506.897
1.94013	484.009
2.02712	481.262
2.06628	476.074
2.23592	476.685
2.21853	484.924
2.22288	480.652
1.94447	495.911
2.04887	492.859
2.04887	489.502
2.27073	484.619
2.17068	476.379
2.23157	468.14
2.20113	503.845
1.93142	494.995
1.95752	471.191
2.02712	487.671
2.30552	462.036
2.13152	501.099
2.02278	484.009
2.13587	479.431
2.21418	467.834
2.14023	468.75
2.05322	486.755
2.15762	474.548
2.11413	485.535
1.99232	484.619
1.91837	493.469
2.13152	477.6
1.97927	473.022
2.15327	491.943
2.04887	495.3
2.46212	450.745
2.39688	460.205
2.72748	466.309
1.91403	480.347
2.26638	493.774
2.33597	448.608
1.82702	488.892
2.24898	487.061
2.21418	480.347
1.91403	470.276
2.00102	480.957
2.03582	482.483
2.34468	464.478
2.52303	459.29
2.10542	482.788
2.16197	483.398
2.59698	425.415
2.73617	414.429
2.29248	484.619
2.22722	461.121
1.95318	467.224
1.97493	481.262
1.86183	467.834
1.96188	494.385
2.06628	479.126
2.35338	470.886
2.21418	494.08
2.48822	456.543
1.90532	478.21
1.71827	447.998
2.34468	467.834
2.12283	472.412
1.97493	500.793
1.89227	469.055
2.14893	479.126
1.92708	502.625
2.07063	485.84
2.11413	497.742
2.06628	507.812
2.51432	424.805
3.38868	331.116
3.19292	346.375
2.54042	507.812
2.87973	376.892
2.47518	464.478
2.91018	370.483
2.92322	350.952
3.06677	380.554
3.13638	366.516
2.22722	496.521
2.00972	497.742
2.01408	498.047
1.85312	478.21
1.92273	490.723
3.44088	352.478
3.42347	336.609
4.71542	341.187
4.77632	361.023
3.49742	368.958
2.73617	397.034
2.22288	494.385
2.09673	500.488
2.64918	422.058
2.83623	434.875
2.57958	428.162
1.98798	476.685
2.61872	416.87
3.09287	362.244
2.44473	480.042
1.75307	469.055
2.15327	473.022
2.01843	481.873
1.97057	473.938
2.64482	454.712
2.40557	483.704
2.40557	476.379
2.70138	407.104
2.63178	448.914
3.26688	364.99
1.55733	412.903
2.19678	473.328
2.48822	437.317
2.22722	484.924
2.38382	482.178
2.78403	399.475
2.98848	364.075
1.93142	497.131
2.34468	463.867
2.66222	423.584
2.61002	455.933
2.00972	490.112
2.50563	458.679
2.45777	439.453
2.11848	492.859
1.92708	487.366
2.46212	463.562
2.55348	450.745
1.89663	471.497
2.49257	445.557
3.04937	382.385
2.17503	506.897
2.10977	486.145
2.21418	487.366
2.38382	438.232
2.93193	351.868
2.84492	373.535
2.45343	483.704
2.68398	420.532
2.28377	461.426
2.42733	466.614
2.32293	462.036
2.10542	484.314
2.45343	438.232
1.79222	468.14
2.10107	487.671
2.24898	502.625
2.41863	448.914
2.01843	496.216
2.12717	489.502
2.76227	411.377
3.23208	355.835
2.10107	484.619
2.23592	498.047
2.79707	374.451
3.21902	347.29
2.70573	437.927
2.13587	493.164
2.05322	490.417
2.09238	500.488
2.09238	499.573
2.18372	478.21
1.92708	482.178
2.66657	387.573
3.37127	342.407
4.07163	341.797
3.51918	364.075
2.40123	417.175
2.50997	443.115
2.45343	463.562
2.78837	356.14
4.00202	336.304
4.19778	350.037
3.66708	354.919
2.58827	377.502
2.37947	468.445
2.27942	490.723
2.28812	464.172
2.33597	471.802
2.63178	426.331
2.80578	391.235
2.06628	506.287
3.06677	349.426
2.65353	421.448
2.01408	488.281
3.14073	365.601
3.76713	345.459
2.86232	397.339
1.90532	466.614
2.32293	465.393
2.27508	471.497
3.45827	340.881
3.33648	343.323
4.84157	358.582
5.26352	337.524
2.83623	484.924
2.35772	440.369
2.56217	436.707
1.99667	488.586
3.32342	348.511
3.24947	344.543
2.76662	408.936
2.92322	407.41
2.75358	376.587
2.48387	413.208
1.76612	464.783
2.08367	484.619
1.90098	462.646
2.22722	462.036
1.97057	509.644
2.49693	447.693
2.25332	470.886
2.11413	500.793
2.74052	417.48
1.97493	479.126
2.21418	496.216
2.49257	450.439
2.53172	448.303
1.94883	481.567
2.31858	457.764
2.01408	484.619
1.94883	476.99
2.33597	462.952
2.24898	461.426
2.28812	474.854
2.24028	468.445
2.59262	422.668
3.91067	359.802
4.73717	351.562
4.76328	339.05
3.67143	373.23
1.93578	473.633
1.67912	451.355
2.17068	489.197
2.32728	485.535
2.17937	485.84
1.86183	486.145
2.43167	454.712
2.38817	476.99
2.60133	503.54
1.99667	487.366
2.42298	435.791
2.13152	485.535
2.10542	482.788
2.57088	426.941
2.60568	457.153
2.54478	437.012
2.04018	473.938
2.01408	478.21
1.83573	465.393
2.21418	477.6
2.27073	486.145
1.95318	469.055
1.56167	423.279
1.88793	466.309
3.00588	349.731
1.89227	463.257
2.34032	449.524
2.34468	481.873
1.90532	483.704
1.97927	497.742
2.04887	497.131
1.94013	485.229
1.95752	495.3
1.99232	471.802
2.01843	473.022
1.85312	472.717
1.89663	490.723
1.97927	494.08
2.03582	482.483
2.01408	494.385
2.02278	476.379
2.04453	483.704
1.94447	482.788
1.90098	488.892
1.99232	469.971
1.99232	480.042
1.97057	493.469
1.99232	485.229
1.99232	473.022
1.98362	474.548
1.97057	489.807
1.97493	479.126
1.95752	498.352
1.97493	473.328
1.99667	490.112
1.97927	467.834
2.00102	480.652
1.99232	484.009
1.96622	485.84
1.97057	479.736
1.97927	479.736
1.99232	475.464
2.00102	487.366
2.00537	497.742
2.01408	466.003
2.00972	496.521
1.99667	476.074
2.00102	487.976
2.00102	479.736
1.99667	492.249
2.00537	502.625
2.00972	480.042
2.01843	485.229
2.00972	474.854
2.00972	508.423
2.00972	480.347
2.00537	486.755
2.00972	472.412
2.01843	497.437
2.06193	485.535
2.13587	474.548
2.02278	489.502
2.05322	482.788
2.02278	486.755
1.99667	482.788
2.01843	486.145
2.01843	483.093
1.99667	480.957
2.04887	499.268
2.01408	469.666
2.10107	488.892
2.08367	493.164
2.04018	478.821
2.04018	500.183
2.03582	490.112
2.01843	506.287
2.03147	473.938
2.04018	482.483
2.02278	499.878
2.05322	485.535
2.05757	498.352
2.01408	491.943
2.03147	476.685
2.04453	497.437
2.02712	477.6
2.04887	491.333
2.01843	477.905
2.03147	485.84
2.04018	493.774
2.07063	479.126
2.07063	508.118
2.04887	487.976
2.09673	483.398
2.04453	488.892
2.05322	478.516
2.04887	488.586
2.06193	483.093
2.03147	496.826
2.06628	485.229
2.07932	476.685
2.06628	509.338
2.04018	469.971
2.07063	492.249
2.01843	499.573
2.01408	472.717
2.04453	492.249
2.06193	478.21
2.04453	495.911
2.06628	501.404
2.08803	484.619
2.06193	494.995
2.06628	495.911
2.07497	487.061
2.07497	502.625
2.07497	475.769
2.06628	493.469
2.07497	485.229
2.09238	477.6
2.08367	498.352
2.07932	474.854
2.06193	487.671
2.06193	490.417
2.05757	479.736
2.07497	495.3
2.11413	488.281
2.08803	480.347
2.08803	497.742
2.06193	474.548
2.07063	483.704
2.07063	486.755
2.08367	481.262
2.11848	488.892
2.15327	488.586
2.07932	482.788
2.10107	498.657
2.12283	482.178
2.12283	475.769
2.04887	492.859
2.05757	489.807
2.04887	490.417
2.09238	503.54
2.06628	489.502
2.08803	491.943
2.07932	479.126
2.06628	491.638
2.08367	479.126
2.06193	483.093
2.07932	501.709
2.05757	475.159
2.05322	502.014
2.04018	498.047
2.06628	468.14
2.11413	496.521
2.11848	501.404
2.09238	484.924
2.10542	508.423
2.11848	482.788
2.11848	477.295
2.08803	497.437
2.08367	474.243
2.07932	488.892
2.10107	501.709
2.13587	491.943
2.10977	483.093
2.14023	497.437
2.14023	480.957
2.09238	487.671
2.10107	499.573
2.08367	487.061
2.08367	486.755
2.08367	493.469
2.05757	478.516
2.07497	500.793
2.09673	500.488
2.08803	472.412
2.10107	498.352
2.08367	489.502
2.09673	475.464
2.07497	505.066
2.10107	486.45
2.11848	478.21
2.10977	494.08
2.10107	479.736
2.10977	498.047
2.14023	501.099
2.14458	476.074
2.10977	489.197
2.12283	497.742
2.15762	481.873
2.10977	491.028
2.11848	488.892
2.12717	483.704
2.17068	494.995
2.11413	495.3
2.12283	474.243
2.09238	495.3
2.14458	495.911
2.09238	487.366
2.11848	490.723
2.10107	494.08
2.08367	483.093
2.10542	494.08
2.09673	481.873
2.13587	480.957
2.13587	495.911
[truncated: 300 more rows]
